# Supplementary material for: Gold-catalysed cross-coupling between aryldiazonium salts and arylboronic acids: probing the usefulness of photoredox conditions
Source: Royal Society of Chemistry journal article supplement (doi:10.1039/c6cc04239b), 2016-01-01
Supplement: c6cc04239b1.pdf [file c6cc04239b1.pdf]

# Gold-Catalysed Cross-Coupling between Aryldiazonium Salts and Arylboronic Acids: Probing the Usefulness of Photoredox Conditions.

Thomas Cornilleau,<sup>†</sup> Philippe Hermange<sup>\*,†</sup> and Eric Fouquet<sup>\*,†</sup>

<sup>†</sup>*Univ. Bordeaux, Institut des Sciences Moléculaires, UMR-CNRS 5255, 351, Cours de la Libération, 33405 Talence Cedex, France.*

*philippe.hermange@u-bordeaux.fr, eric.fouquet@u-bordeaux.fr*

## ***Supplementary Information***

## *Table of contents*

|                                                                                                         |    |
|---------------------------------------------------------------------------------------------------------|----|
| A) General methods.....                                                                                 | 3  |
| B) General procedures.....                                                                              | 5  |
| 1) Preparation of the aryldiazonium salts .....                                                         | 5  |
| 2) Preparation of 3-(hydroxymethyl)-4-iodobenzenediazonium tetrafluoroborate <b>1p</b> .....            | 5  |
| 3) Optimization of the conditions.....                                                                  | 6  |
| 4) Preparation of PPh <sub>3</sub> AuPh.....                                                            | 6  |
| 5) Gold-catalysed cross coupling of arylboronic acids and aryldiazonium salts .....                     | 6  |
| 6) Carbonylation of <b>3p</b> with the two-chamber system (S) .....                                     | 7  |
| 7) Coupling of <b>1n</b> and <b>1p</b> under Shi's conditions:.....                                     | 8  |
| 8) Coupling under Felpin's conditions: .....                                                            | 8  |
| 9) Course of the PPh <sub>3</sub> AuCl-catalysed synthesis of 4-nitro-1,1'-biphenyl ( <b>3b</b> ) ..... | 9  |
| 10) Determination of the quantum yields (Φ) .....                                                       | 10 |
| 11) Stoichiometric reactions between PPh <sub>3</sub> AuPh and <b>1a</b> / <b>1b</b> .....              | 12 |
| C) Compounds characterization .....                                                                     | 14 |
| D) <sup>1</sup> H and <sup>13</sup> C NMR Spectra .....                                                 | 21 |

## A) General methods

All commercial materials were used without further purification, unless indicated.  $^1\text{H}$  NMR and  $^{13}\text{C}$  NMR were recorded on Bruker DPX-200 FT ( $^1\text{H}$ : 200MHz,  $^{13}\text{C}$ : 50.2MHz), Bruker Avance 300 FT ( $^1\text{H}$ : 300MHz,  $^{13}\text{C}$ : 75.3MHz) spectrometers. The chemical shifts for the NMR spectra are reported in ppm relative to the solvent residual peak<sup>1</sup>. Coupling constants J are reported in hertz (Hz). The following abbreviations are used for the multiplicities: s, singlet; d, doublet; t, triplet; q, quartet; qt, quintet; st, sextet; m, multiplet; br, broad; dd, doublet of doublet. Yields refer to isolated material determined to be pure by NMR spectroscopy and thin-layer chromatography (TLC), unless specified in the text. Analytical TLC was performed on Fluka Silica Gel 60 F254. High resolution mass spectra were performed by the CESAMO (Talence, France) and were recorded on Qq-TOF tandem mass spectrometer (API Q-STAR Pulsari, Applied Biosystems). Positive ion mode ESI-MS was used for the analysis. Blue light irradiations were performed with a Flexled INSPIRE LED lamp (1.5m, 45LED, 25 LUMEN, 3.45 W;  $\lambda = 465$  nm) coiled inside a glass tube. Absorption spectra were recorded on a Varian Cary 5000 spectrophotometer in 1 cm pathlength quartz cells. All the reactions were performed in a sealed tube. When the irradiation was turned on, the internal temperature of the photochemical system slightly increased and stabilized at 30°C. The two-chamber system (S) was bought at SyTracks (<http://www.sytracks.com>).

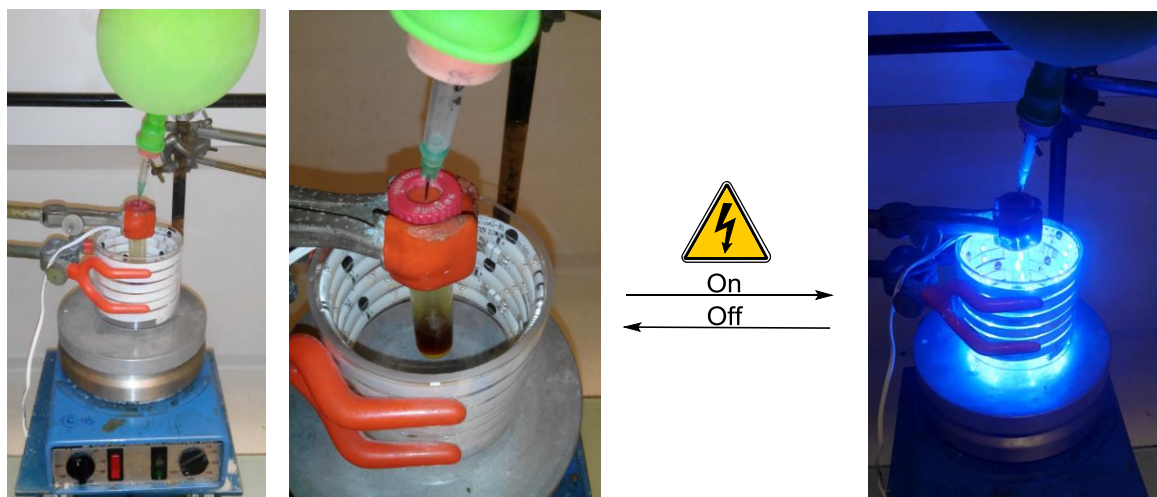

**Blue light irradiation**

<sup>1</sup> Fulmer, G. R.; Miller, A. J. M.; Sherden, N. H.; Gottlieb, H. E.; Nudelman, A.; Stoltz, B. M.; Bercaw, J. E.; Goldberg, K. I. *Organometallics* **2010**, 29, 2176

### Photochemical system

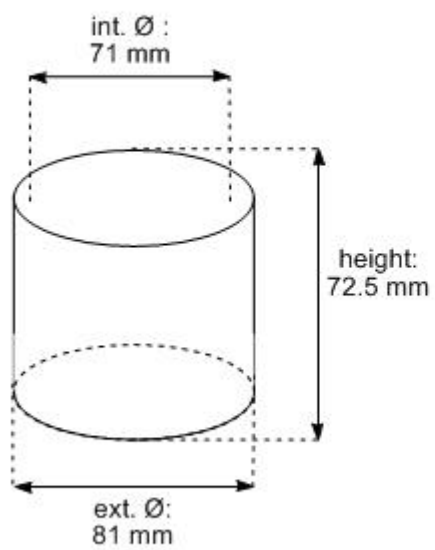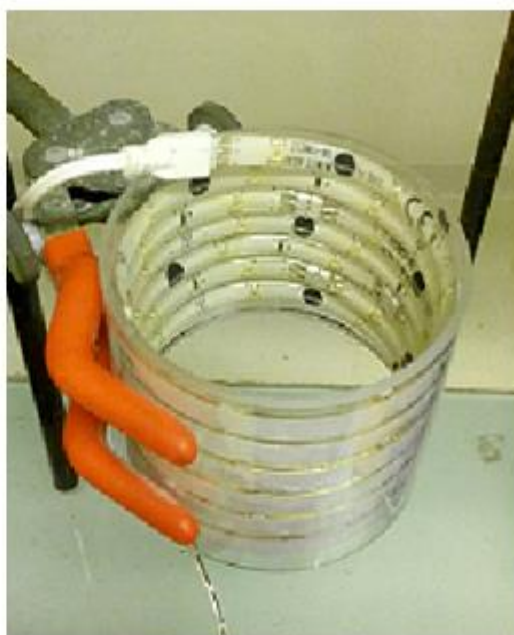

### Reaction tube

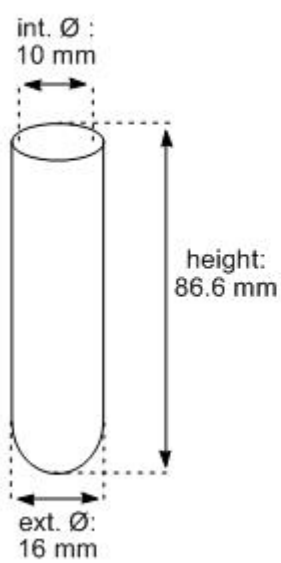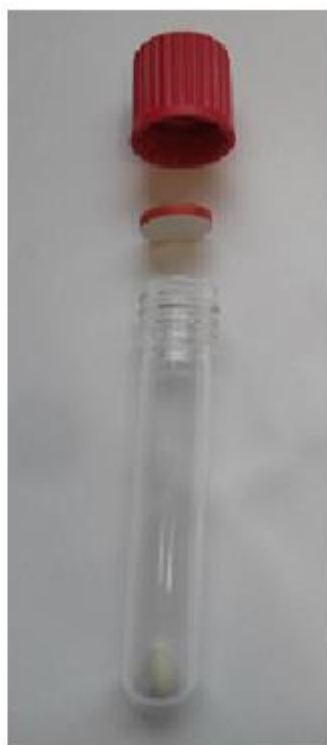

## B) General procedures

### 1) Preparation of the aryldiazonium salts

Aryl diazonium salts were synthesized according to previous literature reports.<sup>2</sup> The aniline (10 mmol, 1eq) was added to 6 mL of a 1:1 mixture of a solution of fluoroboric acid (50% w/w in H<sub>2</sub>O) and distilled water at 0°C. Then, an ice-cold solution of sodium nitrite (704 mg, 10.2 mmol, 1.02 eq) in distilled water (3mL) was added. After stirring for 30 min at 0°C., the precipitate was collected on a Hirsch funnel and washed three times with 1-2 mL of ice-cold distilled water. The solid was dissolved in acetone and precipitated by slow addition of diethyl ether to the solution. The mixture was triturated, the supernatant was removed and this procedure was repeated two times. Aryldiazonium salts were obtained as white crystalline solids with yields ranging from 65% to 92%.

### 2) Preparation of 3-(hydroxymethyl)-4-iodobenzenediazonium tetrafluoroborate

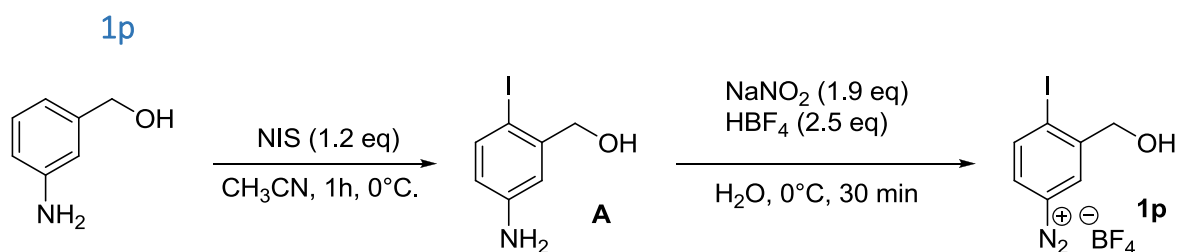

3-Aminobenzylalcohol (1.23g, 10 mmol, 1eq) was dissolved in 30 mL of CH<sub>3</sub>CN and stirred at 0°C. A solution of N-iodosuccinimide (2.7g, 12 mmol, 1.2eq), in 30 mL of CH<sub>3</sub>CN was added dropwise. The reaction mixture was stirred at 0°C for 30 min. Then, the reaction was quenched with a saturated aqueous solution of Na<sub>2</sub>S<sub>2</sub>O<sub>3</sub> (60 mL). The mixture was extracted three times with ethyl acetate (3 x 30 mL). The combined organic phases were washed four times (4 x 20 mL) with an aqueous solution of HCl (2.5M). The acid aqueous layer was collected and solid NaOH was added until reaching pH 11. The aqueous layer was extracted three times with ethyl acetate (3 x 30 mL). The combined organic layers were dried with MgSO<sub>4</sub> and the solvent was removed under reduced pressure to give 2.5 g of **A** as a white power (10 mmol, 100%).

Compound **A** (1.0 g, 4 mmol, 1eq) was added to a 1:1 mixture of aqueous tetrafluoroboric acid (1.25 mL, 10 mmol, 2.5eq, 50% w/w) and water (1.25 mL) at room temperature. The mixture was cooled to 0 °C and a solution of sodium nitrite (524 mg, 7.6 mmol, 1.9eq) in H<sub>2</sub>O (1.1 mL) was added dropwise. The reaction mixture was stirred at 0 °C for 30 minutes, and the resulting solid was filtered off using a sintered-glass filter. The solid was recrystallized from acetone and ice-cold diethyl ether to give 791 mg of **1p** (2.27mmol, 57%) as a brown solid.

<sup>2</sup> Broxton, T. J.; Bunnett, J. F.; Paik, C. H. *J. Org. Chem.* **1977**, 42, 643

### 3) Optimization of the conditions

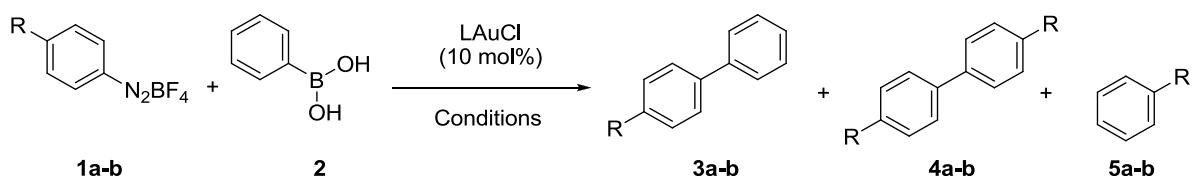

In a tube were added 30.5 mg of phenylboronic acid **2** (250  $\mu\text{mol}$ , 1 eq), the diazonium salt **1a** or **1b**, the gold complex (25  $\mu\text{mol}$ , 10 mol%), the base (0.5 to 2.0 eq) and the photosensitizer if needed. The tube was sealed, purged three times with argon, and placed inside the turned-off photochemical reactor.  $\text{CH}_3\text{CN}$  (2 mL) was added and the blue light irradiation was turned on. The reaction mixture was stirred at  $30^\circ\text{C}$  (controlled by a thermometer) under blue light irradiation for 16h. The **1/3/4/5** ratios were determined by analysis of the  $^1\text{H}$  NMR of the crude mixture.

### 4) Preparation of $\text{PPh}_3\text{AuPh}$

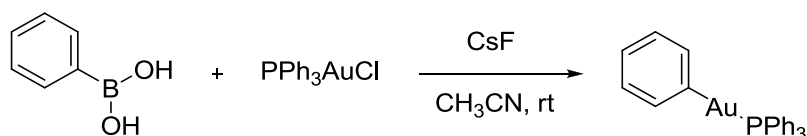

In a vial was added  $\text{PPh}_3\text{AuCl}$  (49.5 mg, 0.1 mmol, 1 eq), dried  $\text{CsF}$  (30.4 mg, 0.2 mmol, 2 eq) and phenylboronic acid (12.2 mg, 0.1 mmol, 1 eq). The vial was purged three times with argon and  $\text{CH}_3\text{CN}$  (1 mL) was added. The reaction mixture was stirred at room temperature for 45 min. The solvent was removed under reduced pressure. Benzene (2 mL) was added to the residue and the mixture was filtered through a Celite pad. The filtrate was evaporated under reduced pressure and triturated with pentane to precipitate the product. The resulting white suspension was evaporated under reduced pressure to give 53 mg of  $\text{PPh}_3\text{AuPh}$  (0.1 mmol, 100%) as a white solid.  $^1\text{H}$ -NMR spectrum was in accordance to the data previously reported.<sup>3</sup>

### 5) Gold-catalysed cross coupling of arylboronic acids and aryl diazonium salts

#### Conditions with the acridinium as photosensitizer (A):

In a tube were added the boronic acid **2** (250  $\mu\text{mol}$ , 1 eq), the diazonium salt **1** (375  $\mu\text{mol}$ , 1.5 eq), 12.4 mg of  $\text{PPh}_3\text{AuCl}$  (25  $\mu\text{mol}$ , 10 mol%), 4.0 mg of 9-mesityl-10-acridinium tetrafluoroborate (10  $\mu\text{mol}$ , 4 mol%) and 40.0 mg of dried  $\text{CsF}$  (263  $\mu\text{mol}$ , 1.05 eq). The tube was sealed, purged three times with argon, and placed inside the turned-off photochemical reactor.  $\text{CH}_3\text{CN}$  (2 mL) was added and the blue light irradiation was turned on. The reaction mixture was stirred at  $30^\circ\text{C}$  (controlled by a

<sup>3</sup> Hashmi, A. S. K.; Ramamurthi, T. D.; Rominger, F. J. *Organomet. Chem.*, **2009**, 694, 592.

thermometer) under blue light irradiation for 16h. The solvent was evaporated under reduced pressure and the residue was purified by column chromatography on silica gel.

#### **Conditions with of Ru(bpy)<sub>3</sub><sup>2+</sup> as photosensitizer (R):**

In a tube were added the boronic acid **2** (250 μmol, 1 eq), the diazonium salt **1** (375 μmol, 1.5 eq), 12.4 mg of PPh<sub>3</sub>AuCl (25 μmol, 10 mol%), 4.3 mg of Ru(bpy)<sub>3</sub>(PF<sub>6</sub>)<sub>2</sub> (5 μmol, 2 mol%) and 40.0 mg of dried CsF (263 μmol, 1.05 eq). The tube was sealed, purged three times with argon, and placed inside the turned-off photochemical reactor. CH<sub>3</sub>CN (2 mL) was added and the blue light irradiation was turned on. The reaction mixture was stirred at 30°C (controlled by a thermometer) under blue light irradiation for 16h. The solvent was evaporated under reduced pressure and the residue was purified by column chromatography on silica gel.

#### **Conditions in the dark (D):**

In a tube were added the boronic acid **2** (250 μmol, 1 eq), the diazonium salt **1** (375 μmol, 1.5 eq), 12.4 mg of PPh<sub>3</sub>AuCl (25 μmol, 10 mol%) and 40.0 mg of dried CsF (263 μmol, 1.05 eq). The tube was sealed, purged three times with argon, fully covered by an aluminum foil and placed inside the turned-off photochemical reactor. CH<sub>3</sub>CN (2 mL) was added and the blue light irradiation was turned on. The reaction mixture was stirred at 30°C (controlled by a thermometer) under blue light irradiation for 16h. The solvent was evaporated under reduced pressure and the residue was purified by column chromatography on silica gel.

#### **6) Carbonylation of **3p** with the two-chamber system (S)**

In the chamber 1 of the two-chamber system were added Ph<sub>2</sub>MeSi-<sup>13</sup>COOH **8\*** (28.5 mg, 0.117 mmol, 1 eq). The chamber 1 was sealed with a screwcap fitted with a silicone/PTFE seal. In the chamber 2 of the two-chamber system were added successively the aryl iodide **3p** (40 mg, 0.129 mmol, 1.1 eq), Pd(dba)<sub>2</sub> (6.7 mg, 11.7 μmol, 10 mol%), xantphos (6.8 mg, 11.7 μmol, 10 mol%), DABCO (28.9 mg, 0.257mmol, 2 eq). The chamber 2 was sealed with a screwcap fitted with a silicone/PTFE seal. The atmosphere of the two-chamber system was purged three times with argon. Then, 1 mL of dry THF was added by syringe in each chamber through the silicone/PTFE seal. The loaded two-chamber system was stirred at 70°C, then 12 μl of a solution of TBAF (1M in THF, 12 μmol, 10 mol%) were added through a silicone/PTFE seal in the chamber 1. The system was stirred at 70°C for 1 hour. After a careful opening, the crude reaction mixture from chamber 2 was concentrated under reduced pressure. The residue was purified by silica gel flash chromatography (60/40:cyclohexane/diethyl ether) affording 22 mg of **7** (0.104 mmol, 90%) as a white solid.

### 7) Coupling of **1n** and **1p** under Shi's conditions:

Ph<sub>3</sub>PAu(TA)OTf (prepared according to a previously described procedure)<sup>i</sup> (14.8 mg, 0.04 mmol, 10 mol%), 2,2'-bipyridyl (12.4 mg, 0.08 mmol, 20 mol%), sodium carbonate (84.8 mg, 0.8 mmol, 2 eq) and phenyl boronic acid **2** (48.8 mg, 0.4 mmol, 1 eq) were added to 0.8 mL of freshly distilled acetonitrile in a 1 mL-dram vial. To this solution was added the diazonium salt **1n** (0.48 mmol, 1.2 eq). The mixture was stirred under room temp for 10 hrs. Upon reaction completion, the solvent was removed under reduced pressure and the residue was purified by silica gel flash chromatography (cyclohexane) affording 16 mg of **3n** (0.057 mmol, 14%) as a white solid.

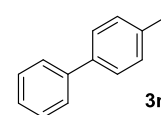

Ph<sub>3</sub>PAu(TA)OTf (14.8 mg, 0.04mmol, 10 mol%), 2,2'-bipyridyl (12.4 mg, 0.08 mmol, 20 mol%), sodium carbonate (84.8 mg, 0.8 mmol, 2 eq) and phenyl boronic acid **2** (48.8 mg, 0.4 mmol, 1 eq) were added to 0.8 mL of freshly distilled acetonitrile in a 1 mL-dram vial. To this solution was added the diazonium salt **1p** (167 mg, 0.48 mmol, 1.2 eq). The mixture was stirred under room temp for 10 hrs. Upon reaction completion, the solvent was removed under reduced pressure and the residue was purified by silica gel flash chromatography (80/20:cyclohexane/diethyl ether) affording 12 mg of **3p** (0.039 mmol, 10%) as a white solid.

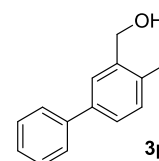

### 8) Coupling under Felpin's conditions:

To a solution of the diazonium salt **1p** (125 mg, 0.36 mmol, 1.2 eq) in MeOH (4.8 mL) were added phenyl boronic acid **2** (36 mg, 0.3 mmol, 1eq) and 5% w/w Pd(0)/BaCO<sub>3</sub> (3.2 mg, 0.5 mol%). The resulting mixture was stirred for 12 hours at room temperature and then concentrated under reduced pressure. The crude was purified by flash chromatography (cyclohexane) affording 5.5 mg of **3p** (0.018 mmol, 6 %) as a white solid.

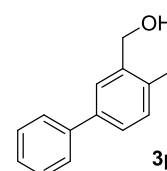

To a solution of the diazonium salt **1q** (125 mg, 0.36 mmol, 1.2 eq) in MeOH (4.8 mL) were added 3-hydroxyphenyl boronic acid (41 mg, 0.3 mmol, 1eq) and 5% w/w Pd(0)/BaCO<sub>3</sub> (3.2 mg, 0.5 mol%). The resulting mixture was stirred for 12 hours at room temperature and then concentrated under reduced pressure. The crude was purified by flash chromatography (cyclohexane) affording 15 mg of **3q** (0.046 mmol, 15 %) as a white solid.

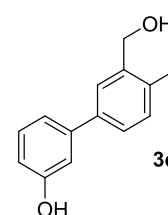



### 9) Course of the $\text{PPh}_3\text{AuCl}$ -catalysed synthesis of 4-nitro-1,1'-biphenyl (**3b**)

In a tube were added 30.5 mg of phenyl boronic acid **2** (250  $\mu\text{mol}$ , 1 eq), 88.8 mg of 4-nitrobenzenediazonium tetrafluoroborate **1b** (375  $\mu\text{mol}$ , 1.5 eq), 12.4 mg of  $\text{PPh}_3\text{AuCl}$  (25  $\mu\text{mol}$ , 10 mol%), 40.0 mg of dried CsF (263  $\mu\text{mol}$ , 1.05 eq) and 14 mg of 1,3,5-trimethoxybenzene (83  $\mu\text{mol}$ , 0.33 eq) as internal standard. 4.3 mg of  $\text{Ru}(\text{bpy})_3(\text{PF}_6)_2$  (5  $\mu\text{mol}$ , 2 mol%) were also added for the reaction performed under blue light irradiation. The tube was sealed and purged three times with nitrogen, and placed inside the turned-off photochemical reactor.  $\text{CH}_3\text{CN}$  (2 mL) was added and the blue light irradiation was turned on. The reaction mixture was stirred at 30°C (controlled by a thermometer) under blue light irradiation (blue line) or under the dark (covered by an aluminium foil, orange line). The yields of 4-nitro-1,1'-biphenyl (**3b**) were determined by analysis of the  $^1\text{H}$ -NMR spectra of aliquots of the reaction mixture (protected from light, diluted in  $\text{CDCl}_3$ , 1,3,5-trimethoxybenzene as internal standard.).

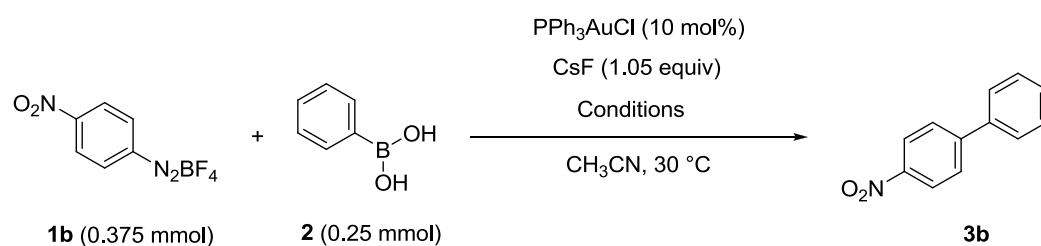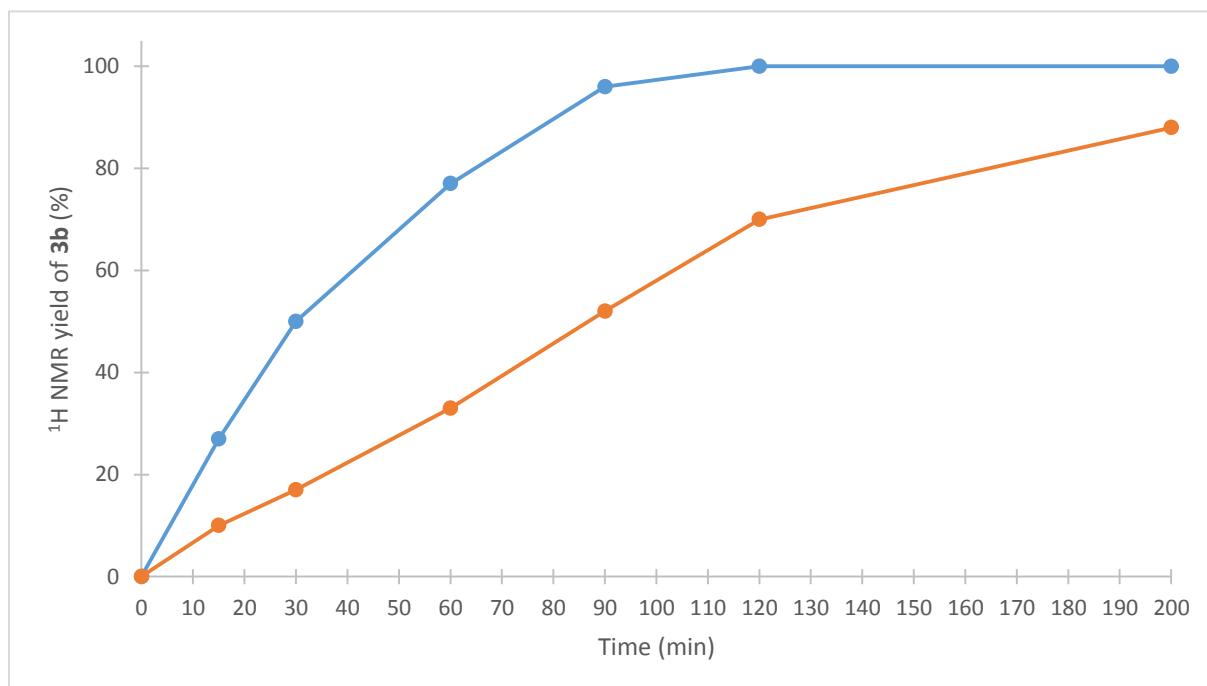

Figure 1: Evolution in time of the  $^1\text{H}$  NMR yield of **3b** in the dark (orange line) or under blue LEDs irradiation in combination with  $\text{Ru}(\text{bpy})_3(\text{PF}_6)_2$  (blue line).

## 10) Determination of the quantum yields ( $\phi$ )

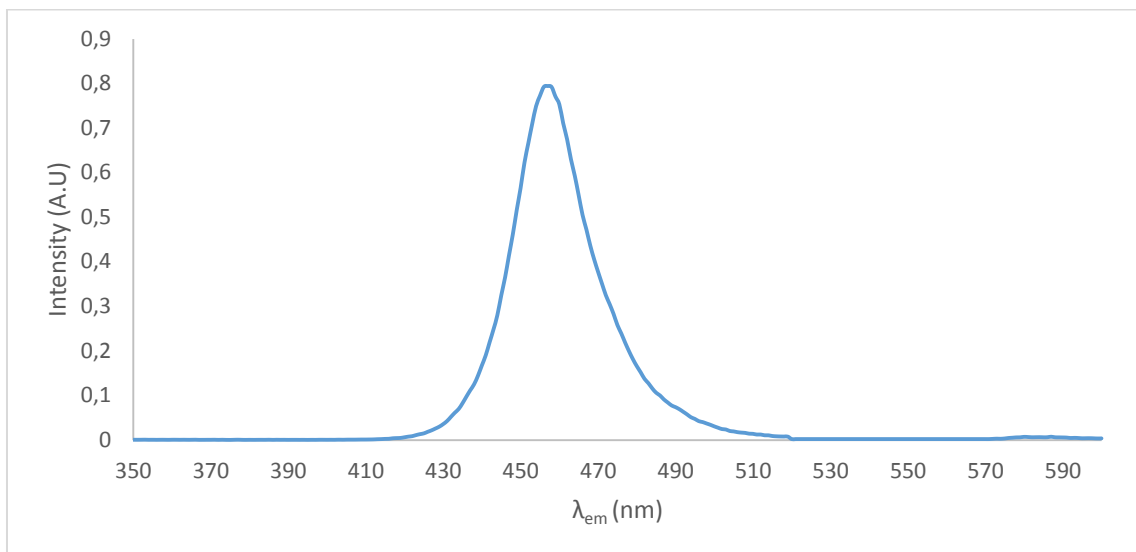

Figure 2 : Emission spectrum of the blue LEDs of the photochemical system ( $\lambda_{max} = 458$  nm)

Following a modified procedure reported previously,<sup>ii</sup> an aqueous ferrioxalate actinometer solution was prepared and stored in the dark. This actinometer solution measures the photodecomposition of ferric oxalate anions to ferrous oxalate anions, which are then reacted with 1, 10-phenanthroline to form  $\text{Fe(Phen)}_3^{2+}$ . Its concentration is then estimated by UV/Vis absorbance at 510 nm. The number of moles of  $\text{Fe(Phen)}_3^{2+}$  complex formed is related to the number of photons absorbed by the actinometer solution.

### *Preparation of the solutions used for the studies:*

- 1) Potassium ferrioxalate solution: Potassium ferrioxalate trihydrate (295 mg) and 95-98%  $\text{H}_2\text{SO}_4$  (140  $\mu\text{L}$ ) were added to a 50 mL volumetric flask and filled to the mark with distilled water. The solution was stored in the dark.
- 2) Buffered solution of phenantroline : 1,10-phenantroline (25 mg), sodium acetate (5.63 g) in  $\text{H}_2\text{SO}_4$  (25 mL of 0.5 M). The solution was stored in the dark.
- 3) The reaction solution: the phenylboronic acid **2** (250  $\mu\text{mol}$ , 1 eq), the diazonium salt **1a** or **1b** (375  $\mu\text{mol}$ , 1.5 eq), 12.4 mg of  $\text{PPh}_3\text{AuCl}$  (25  $\mu\text{mol}$ , 10 mol%), 4.3 mg of  $\text{Ru(bpy)}_3(\text{PF}_6)_2$  (5  $\mu\text{mol}$ , 2 mol%) and 40.0 mg of dried  $\text{CsF}$  (263  $\mu\text{mol}$ , 1.05 eq) were added to a sealable quartz cuvette ( $l = 1$  cm) containing a stirring bar. In the absence of light,  $\text{CH}_3\text{CN}$  (2.0 mL) was added under argon.

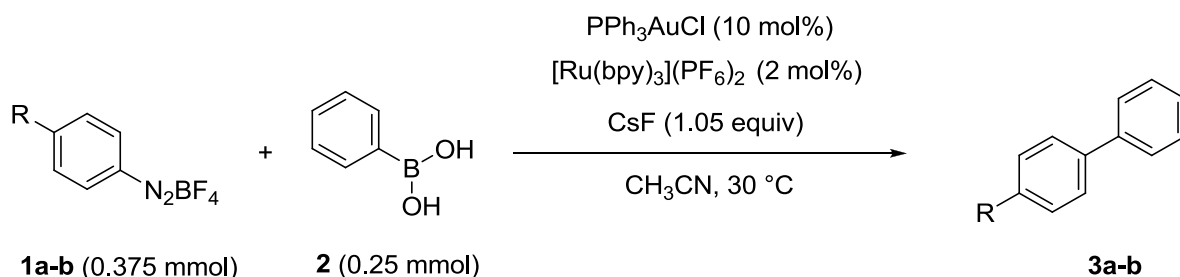

*Actinometry measurements:*

- Two quartz cuvettes ( $l = 1$  cm) were filled with 2 mL of the potassium ferrioxalate solution. One of the cuvettes was placed in the photochemical system ( $\lambda_{\text{max}} = 458$  nm) and irradiated for 90 s, the second cuvette was stored in the dark.
- After irradiation, 0.35 mL of phenantroline solution was added to both cuvettes. The mixtures were stirred in the dark for 1 h to allow complete coordination of the phenantroline to ferrous ions.
- The absorbance of both solutions were measured by UV/Vis spectrophotometry at  $\lambda = 510$  nm.
- The number of moles of  $\text{Fe}^{2+}$  formed was determined by the following equation:

$$\text{mol Fe}^{2+} = \frac{V \cdot \Delta A(510 \text{ nm})}{l \times \varepsilon}$$

Where:

$V$  = Irradiated volume (0.00235 L).

$\Delta A$  (510 nm) = Difference in absorbance between the irradiated solution and the solution stored in dark.

$\varepsilon$  = Molar extinction coefficient of  $[\text{Fe}(\text{Phen})_3]^{2+}$  complex (11100  $\text{L} \cdot \text{mol}^{-1} \cdot \text{cm}^{-1}$ ).

$l$  = Optical path-length of the cuvette (1 cm).

- The photon flux can be calculated using :

$$\text{Photon flux} = \frac{\text{mol Fe}^{2+}}{\Phi \times t \times f}$$

Where:

$\Phi$  = Quantum yield for the ferrioxalate actinometer (0.85 at  $\lambda_{\text{ex}} = 458$  nm).<sup>iii</sup>

$t$  = Irradiation time (90 s)

$f$  = Fraction of light absorbed at  $\lambda_{\text{ex}} = 458$  nm by the actinometer. This value is calculated using  $f = 1 - 10^{-A(458 \text{ nm})}$ ,  $A(458 \text{ nm})$  is the absorbance of the ferrioxalate solution at 458 nm.

- The photon flux was determined to be  $5.03 \times 10^{-9}$  einsteins. $\text{s}^{-1}$  (average of three experiments).
- After 1h of irradiation, the number of moles of the biaryl product (**3a** or **3b**) was determined by  $^1\text{H}$  NMR analysis of the crude using 1,3,5-trimethoxybenzene as internal standard. The

measured absorbance of the reaction solution at 458 nm by UV/Vis spectrophotometer was greater than 3. Thus, the number of moles of photons absorbed by the reaction mixture is roughly equal to the number of moles of incident photon per unit time (Photon flux). The calculated apparent quantum yield ( $\Phi$ ) was determined using :

$$\Phi = \frac{\text{mol of product formed}}{\text{Photon flux} \times t \times f}$$

Where:

Photon flux =  $5.03 \times 10^{-9}$  einsteins.s<sup>-1</sup>.

t = Reaction time (3600 s).

f = Fraction of light absorbed at  $\lambda_{\text{ex}}$  = 458 nm by the reaction mixture. This value is calculated using  $f = 1 - 10^{-A(458 \text{ nm})}$ , A(458 nm) is the absorbance of the reaction mixture at 458 nm.

h) The reaction quantum yield ( $\Phi$ ) was thus determined to be 1.4 with **1a** and 9.6 with **1b**

### 11) Stoichiometric reactions between PPh<sub>3</sub>AuPh and **1a** / **1b**

Six NMR tubes were labelled as **A**, **B**, **C**, **D**, **E** and **F**. PPh<sub>3</sub>AuPh (5.4 mg, 10  $\mu$ mol), 4-methoxybenzenediazonium tetrafluoroborate **1a** (2.2 mg, 10  $\mu$ mol) and 9-mesityl-10-acridinium tetrafluoroborate (0.2mg, 0.5  $\mu$ mol) were added in tube **A** and **B** and dissolved in 0.4 ml of CD<sub>3</sub>CN. PPh<sub>3</sub>AuPh (5.4 mg, 10  $\mu$ mol) and diazonium salt **1a** (2.2 mg, 10  $\mu$ mol) were added in tube **C** and dissolved in 0.4 ml of CD<sub>3</sub>CN. PPh<sub>3</sub>AuPh (5.4 mg, 10  $\mu$ mol), 4-nitrobenzenediazonium tetrafluoroborate **1b** (2.4 mg, 10  $\mu$ mol) and 9-mesityl-10-acridinium tetrafluoroborate (0.2mg, 0.5  $\mu$ mol) were added in tube **D** and **E** and dissolved in 0.4 ml of CD<sub>3</sub>CN. PPh<sub>3</sub>AuPh (5.4 mg, 10  $\mu$ mol) and diazonium salt **1b** (2.4 mg, 10  $\mu$ mol) were added in tube **F** and dissolved in 0.4 ml of CD<sub>3</sub>CN.

Tubes **B**, **C**, **E** and **F** were each fully covered by an aluminum foil and all tubes **A**, **B**, **C**, **D**, **E** and **F** were placed in the photochemical reactor. The reactions were monitored by <sup>1</sup>H NMR and <sup>31</sup>P NMR after 3h.

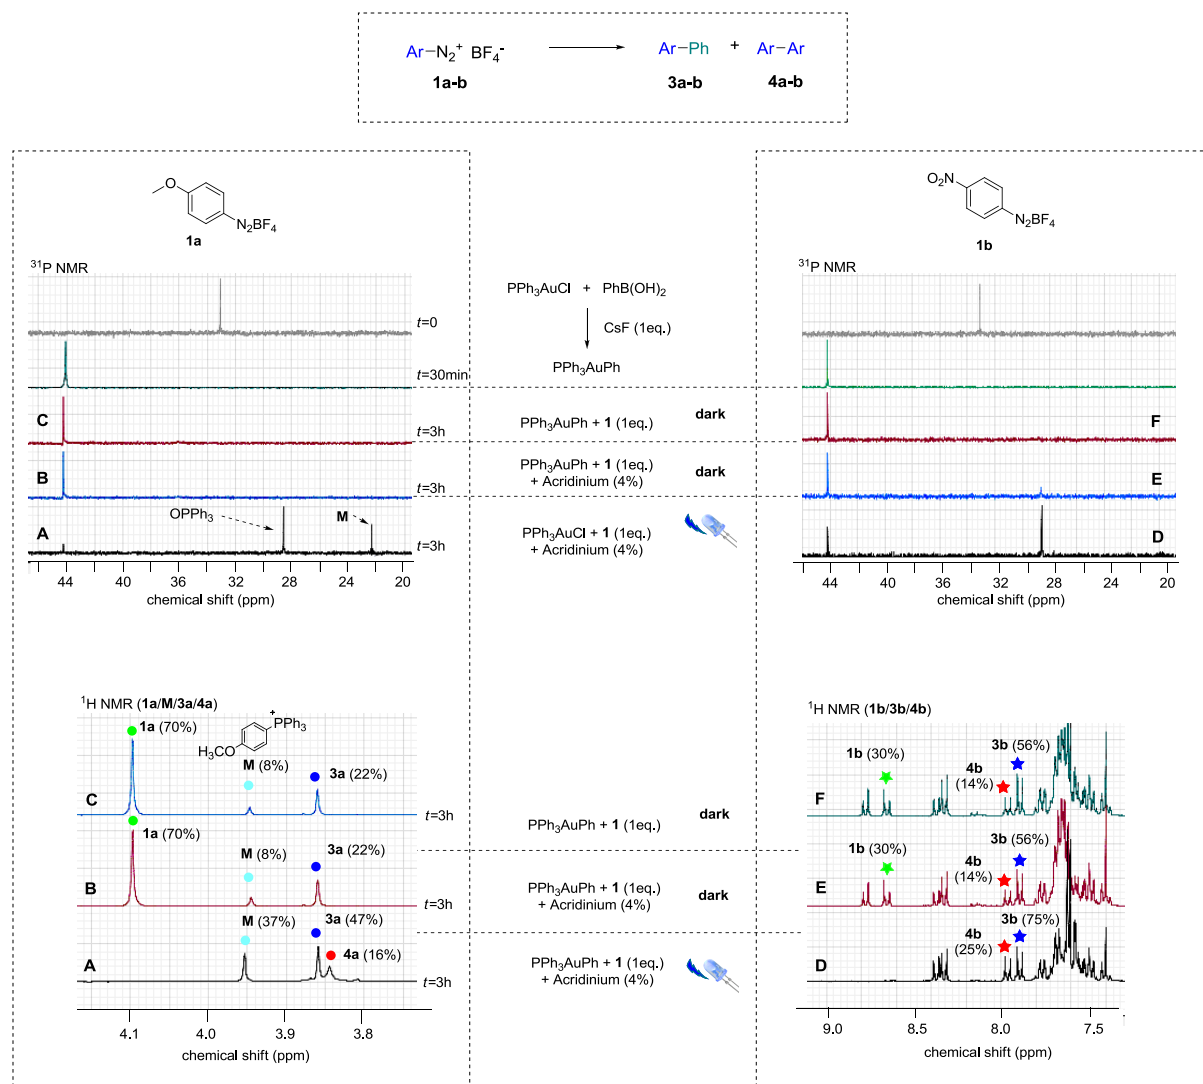

After 3h, <sup>1</sup>H NMR analysis of the reactions performed in the dark indicated 30% of conversion for the methoxy-substituted diazonium salt **1a** (tube **B** and **C**) and 70% of conversion of the nitro-substituted diazonium salt **1b** (tube **E** and **F**). However, both diazonium **1a** and **1b** fully disappeared within 3h when the reactions were performed under blue light irradiation in presence of the acridinium **6**. In tube **A**, **M** may originate from the Au<sup>III</sup> intermediates.<sup>4</sup>

It should be noted that in <sup>31</sup>P NMR, only monitoring of the remaining PPh<sub>3</sub>AuPh was possible. Indeed, formation of the free PPh<sub>3</sub> couldn't be precisely seen on this scale, probably due to the concomitant formation of gold nanoparticles or gold mirrors in these stoichiometric experiments.

<sup>4</sup> Shu, X.; Zhang, M.; He, Y.; Frei, H.; Toste, F. D. *J. Am. Chem. Soc.* **2014**, *136*, 5844.

## C) Compounds characterization

### 5-Amino-2-iodobenzylalcohol **A**

White solid.

$^1\text{H}$  NMR (200MHz, MeOD): 7.38 (d,  $J=8.4$  Hz, 1H), 6.94 (d,  $J=2.9$  Hz, 1H), 6.42 (dd,  $J=8.48$  Hz, 2.9 Hz, 1H), 4.54 (s, 2H).

$^{13}\text{C}$  NMR (75MHz, MeOD): 149.9, 144.8, 140.5, 117.4, 116.4, 81.6, 69.6.

HRMS (ESI)  $\text{C}_7\text{H}_8\text{INO}$ , calculated for  $[\text{M}+\text{H}]$ : 249.9723, found 249.9713.

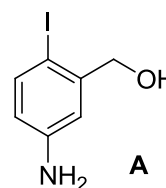

### 3-(Hydroxymethyl)-4-iodobenzenediazonium tetrafluoroborate **1p**

Light brown solid.

$^1\text{H}$  NMR (300MHz,  $\text{CD}_3\text{CN}$ ): 8.51 (d,  $J=2.7$  Hz, 1H), 8.38 (d,  $J=8.7$  Hz, 1H), 8.12 (dd,  $J=8.7$  Hz, 2.7 Hz, 1H), 4.59 (s, 2H).

$^{13}\text{C}$  NMR (75MHz,  $\text{CD}_3\text{CN}$ ): 150.8, 143.4, 131.2, 129.4, 115.5, 115.4, 68.2.

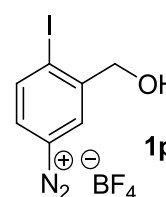

### 4-Methoxy-1,1'-biphenyl<sup>iv</sup> **3a**

The residue was purified by silica gel flash chromatography (90/10:cyclohexane/diethyl ether) affording **3a** as a white solid (*conditions*

*R*: 29.0 mg, 63% yield; *conditions A*: 25.3 mg, 55% yield; *conditions D*: 9.2 mg, 20% yield).

$^1\text{H}$  NMR (300MHz,  $\text{CDCl}_3$ ): 7.56-7.50 (m, 4H), 7.4 (t,  $J=7.7$  Hz, 2H), 7.33-7.26 (m, 1H), 6.97 (d,  $J=8.2$  Hz, 2H), 3.84 (s, 3H).

$^{13}\text{C}$  NMR (75MHz,  $\text{CDCl}_3$ ): 159.0, 140.7, 133.6, 128.6, 128.0, 126.6, 126.5, 114.0, 55.2.

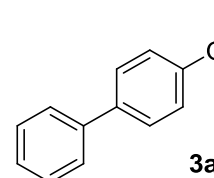

### 4-Nitro-1,1'-biphenyl<sup>v</sup> **3b**

The residue was purified by silica gel flash chromatography

(90/20:cyclohexane/diethyl ether) affording **3b** as a pale yellow solid (*conditions R*: 37.4 mg, 75% yield; *conditions A*: 37.8 mg, 76% yield; *conditions D*: 40.3 mg, 81% yield).

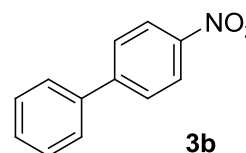

$^1\text{H}$  NMR (300MHz,  $\text{CDCl}_3$ ): 8.28 (d,  $J=8.7$  Hz, 2H), 7.72 (d,  $J=8.7$  Hz, 2H), 7.64-7.58 (m, 2H), 7.58-7.53 (m, 3H).

$^{13}\text{C}$  NMR (75MHz,  $\text{CDCl}_3$ ): 147.9, 147.4, 139.1, 129.5, 129.2, 128.1, 127.7, 124.4.

### 2-Methyl-4'-nitro-1,1'-biphenyl<sup>vi</sup> **3c**

The residue was purified by silica gel flash chromatography (80/20:cyclohexane/diethyl ether) affording **3c** as a colourless oil (*conditions R*: 48.0 mg, 90% yield; *conditions A*: 49.0 mg, 92% yield).

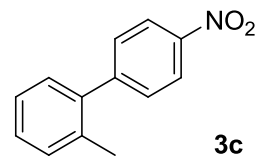

$^1\text{H}$  NMR (300MHz,  $\text{CDCl}_3$ ): 8.27 (d,  $J=8.7$  Hz, 2H), 7.48 (d,  $J=8.7$  Hz, 2H), 7.33-7.25 (m, 3H), 7.22-7.17 (m, 1H), 2.25 (s, 3H).

$^{13}\text{C}$  NMR (75MHz,  $\text{CDCl}_3$ ): 149.1, 147.1, 139.9, 135.3, 131.0, 130.4, 129.7, 128.7, 126.4, 123.7, 20.6.

### 2-Bromo-4'-nitro-1,1'-biphenyl<sup>vii</sup> **3d**

The residue was purified by silica gel flash chromatography (80/20:cyclohexane/diethyl ether) affording **3d** as a colorless oil (*conditions R*: 50.7 mg, 73% yield; *conditions A*: 55.6 mg, 80% yield).

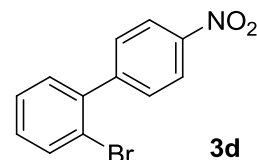

$^1\text{H}$  NMR (300MHz,  $\text{CDCl}_3$ ): 8.27 (d,  $J=8.7$  Hz, 2H), 7.69 (dd,  $J=7.3$  Hz, 1.5 Hz, 1H), 7.57 (d,  $J=8.7$  Hz, 2H), 7.40 (dt,  $J=7.3$  Hz, 1.5 Hz, 1H), 7.32-7.25 (m, 2H).

$^{13}\text{C}$  NMR (75MHz,  $\text{CDCl}_3$ ): 147.7, 145.5, 140.6, 133.7, 131.1, 130.7, 130.1, 127.9, 123.5, 122.2.

### 9-(4-Nitrophenyl)anthracene<sup>viii</sup> **3e**

The residue was purified by silica gel flash chromatography (80/20:cyclohexane/diethyl ether) affording **3e** as a yellow solid (*conditions R*: 29.9 mg, 40% yield; *conditions A*: 41.2 mg, 55% yield).

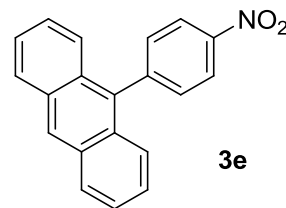

$^1\text{H}$  NMR (300MHz,  $\text{CDCl}_3$ ): 8.55 (s, 1H), 8.45 (d,  $J=8.6$  Hz, 2H), 8.06 (d,  $J=8.5$  Hz, 2H), 7.62 (d,  $J=8.6$  Hz, 2H), 7.53-7.44 (m, 4H), 7.41-7.34 (m, 2H).

$^{13}\text{C}$  NMR (150MHz,  $\text{CDCl}_3$ ): 147.7, 146.5, 134.2, 132.6, 131.4, 129.9, 128.8, 128.0, 126.3, 126.0, 125.5, 123.9.

#### 4-Methoxy-4'-methyl-1,1'-biphenyl<sup>ix</sup> **3f**

The residue was purified by silica gel flash chromatography (90/10:cyclohexane/diethyl ether) affording **3f** as a white solid (*conditions R*: 27.3 mg, 55% yield; *conditions A*: 19.8 mg, 40% yield).

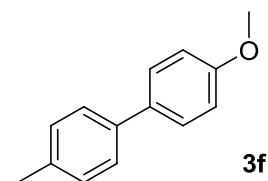

<sup>1</sup>H NMR (300MHz, CDCl<sub>3</sub>): 7.5 (d, *J*=8.6 Hz, 2H), 7.44 (d, *J*=7.7 Hz, 2H), 7.22 (d, *J*=7.7 Hz, 2H), 6.96 (d, *J*=8.6 Hz, 2H), 3.83 (s, 3H), 2.37 (s, 3H).

<sup>13</sup>C NMR (75MHz, CDCl<sub>3</sub>): 159.6, 138.0, 136.4, 129.5, 128.0, 126.6, 114.2, 55.4, 21.1.

#### 4'-Methoxy-2-methyl-1,1'-biphenyl<sup>x</sup> **3g**

The residue was purified by silica gel flash chromatography (90/10:cyclohexane/diethyl ether) affording **3g** as a colourless oil (*conditions R*: 44.6 mg, 90% yield).

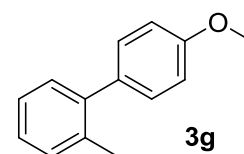

<sup>1</sup>H NMR (300MHz, CDCl<sub>3</sub>): 7.34-7.27 (m, 6H), 7.02 (d, *J* = 8.6 Hz, 2H), 3.92 (s, 3H), 2.35 (s, 3H).

<sup>13</sup>C NMR (75MHz, CDCl<sub>3</sub>): 158.6, 141.6, 135.5, 134.4, 130.4, 130.3, 130.0, 127.0, 125.8, 113.5, 55.3, 20.6.

#### 4'-Methoxy-2-nitro-1,1'-biphenyl<sup>xi</sup> **3h**

The residue was purified by silica gel flash chromatography (90/10:cyclohexane/diethyl ether) affording **3h** as a yellow oil (*conditions R*: 52.7 mg, 92% yield).

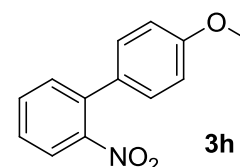

<sup>1</sup>H NMR (300MHz, CDCl<sub>3</sub>): 7.85 (dd, *J*=8.5 Hz, 1.4 Hz, 1H), 7.66-7.60 (m, 1H), 7.48 (t, *J*=7.6 Hz, 2H), 7.30 (d, *J*=8.7 Hz, 2H), 7.00 (d, *J*=8.7 Hz, 2H), 3.89 (s, 3H).

<sup>13</sup>C NMR (75MHz, CDCl<sub>3</sub>): 159.8, 149.6, 136.0, 132.3, 132.1, 129.6, 128.7, 127.9, 127.2, 124.2, 114.4, 55.5.

#### Methyl (1,1'-biphenyl)-4-carboxylate<sup>xii</sup> **3i**

The residue was purified by silica gel flash chromatography (90/10:cyclohexane/diethyl ether) affording **3i** as a white solid (*conditions R*: 34.5 mg, 65% yield; *conditions A*: 34.5 mg, 65% yield).

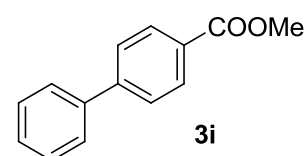



$^1\text{H}$  NMR (300MHz,  $\text{CDCl}_3$ ): 8.09 (d,  $J=8.4$  Hz, 2H), 7.68-7.57 (m, 4H), 7.49-7.33 (m, 3H), 3.93 (s, 3H).

$^{13}\text{C}$  NMR (75MHz,  $\text{CDCl}_3$ ): 166.8, 145.4, 139.8, 129.9, 128.7, 127.9, 127.1, 126.9, 52.0.

#### Methyl 4'-methyl-(1,1'-biphenyl)-4-carboxylate<sup>xiii</sup> **3j**

The residue was purified by silica gel flash chromatography (90/10:cyclohexane/diethyl ether) affording **3j** as a white solid (*conditions R*: 28.3 mg, 50% yield; *conditions A*: 28.2 mg, 50% yield).

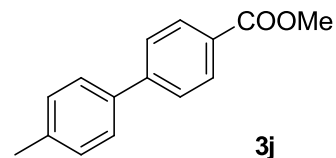

$^1\text{H}$  NMR (300MHz,  $\text{CDCl}_3$ ): 7.99 (d,  $J=8.4$  Hz, 2H), 7.54 (d,  $J=8.4$  Hz, 2H), 7.43 (d,  $J=7.9$  Hz, 2H), 7.17 (d,  $J=7.9$  Hz, 2H), 3.83 (s, 3H), 2.31 (s, 3H).

$^{13}\text{C}$  NMR (75MHz,  $\text{CDCl}_3$ ): 167.1, 145.6, 138.2, 137.1, 130.1, 129.7, 128.6, 127.1, 126.8, 52.2, 21.2

#### Methyl 4'-formyl-(1,1'-biphenyl)-4-carboxylate<sup>xiv</sup> **3k**

The residue was purified by silica gel flash chromatography (80/20:cyclohexane/diethyl ether) affording **3k** as a white solid (*conditions R*: 30.0 mg, 50% yield; *conditions A*: 30.1 mg, 50% yield).

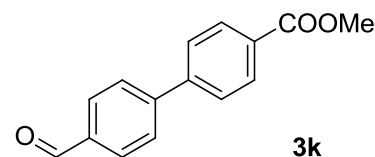

$^1\text{H}$  NMR (300MHz,  $\text{CDCl}_3$ ): 10.06 (s, 1H), 8.12 (d,  $J=8.6$  Hz, 2H), 7.96 (d,  $J=8.3$  Hz, 2H), 7.77 (d,  $J=8.3$  Hz, 2H), 7.69 (d,  $J=8.6$  Hz, 2H), 3.94 (s, 3H).

$^{13}\text{C}$  NMR (75MHz,  $\text{CDCl}_3$ ): 191.9, 130.5, 130.4, 128.1, 127.5, 127.3, 52.4.

#### Methyl 4'-iodo-(1,1'-biphenyl)-4-carboxylate<sup>xv</sup> **3l**

The residue was purified by silica gel flash chromatography (80/20:cyclohexane/diethyl ether) affording **3l** as a white solid (*conditions R*: 46.5 mg, 55% yield; *conditions A*: 31.3 mg, 37% yield).

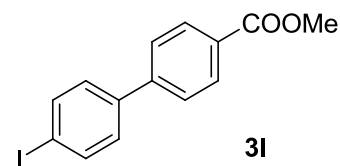

$^1\text{H}$  NMR (300MHz,  $\text{CDCl}_3$ ): 8.08 (d,  $J=8.2$  Hz, 2H), 7.77 (d,  $J=8.12$  Hz, 2H), 7.59 (d,  $J=8.1$  Hz, 2H), 7.33 (d,  $J=8.2$  Hz, 2H), 3.92 (s, 3H).

$^{13}\text{C}$  NMR (75MHz,  $\text{CDCl}_3$ ): 166.7, 144.3, 137.9, 130.0, 129.1, 128.9, 127.1, 126.9, 126.6, 94.0, 52.0.

### 2-Nitro-1,1'-biphenyl<sup>xvi</sup> **3m**

The residue was purified by silica gel flash chromatography (80/20:cyclohexane/diethyl ether) affording **3m** as a yellow oil (*conditions R*: 20.4 mg, 41% yield; *conditions A*: 37.3 mg, 75% yield).

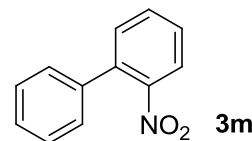

<sup>1</sup>H NMR (300MHz, CDCl<sub>3</sub>): 7.88-7.80 (m, 1H), 7.65-7.56 (m, 1H), 7.51-7.37 (m, 5H), 7.35-7.27 (m, 2H).

<sup>13</sup>C NMR (75MHz, CDCl<sub>3</sub>): 137.6, 136.5, 132.5, 132.5, 128.9, 128.4, 128.1, 124.3.

### 4-Iodo-1,1'-biphenyl<sup>xvii</sup> **3n**

The residue was purified by silica gel flash chromatography (cyclohexane) affording **3n** as a white solid (*conditions R*: 23.1 mg, 33% yield; *conditions A*: 32.9 mg, 47% yield).

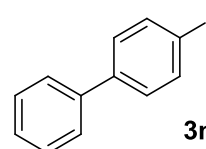

<sup>1</sup>H NMR (300MHz, CDCl<sub>3</sub>): 7.75 (d, *J*=8.4 Hz, 2H), 7.57-7.50 (m, 2H), 7.47-7.29 (m, 5H).

<sup>13</sup>C NMR (75MHz, CDCl<sub>3</sub>): 141.0, 140.3, 138.3, 138.2, 138.1, 129.3, 129.2, 128.0, 127.2, 93.3.

### 4'-iodo-1,1'-biphenyl-3-ol<sup>xviii</sup> **3o**

The residue was purified by silica gel flash chromatography (60/40:cyclohexane/diethyl ether) affording **3o** as a white solid (*conditions R*: 35 mg, 47% yield; *conditions A*: 22 mg, 30% yield).

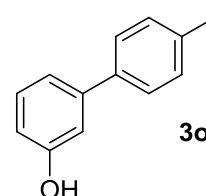

<sup>1</sup>H NMR (300MHz, CDCl<sub>3</sub>): 7.73 (d, *J*=8.4 Hz, 2H), 7.32-7.25 (m, 3H), 7.12-7.07 (m, 1H), 7.01-6.99 (m, 1H), 6.81 (dd, *J* = 2.6, 8.1 Hz, 1H ).

<sup>13</sup>C NMR (75MHz, CDCl<sub>3</sub>): 156.1, 141.9, 140.3, 138.0, 132.7, 130.3, 129.1, 124.7, 120.6, 114.8, 114.0, 93.4.

### 2-Iodo-5-phenylbenzylalcohol **3p**

The residue was purified by silica gel flash chromatography (80/20:cyclohexane/diethyl ether) affording **3p** as a white solid (*conditions R*: 38.7 mg, 50% yield; *conditions A*: 38.8 mg, 50% yield, *Felgin's conditions (Pd)*: 5.5 mg, 6 % yield).

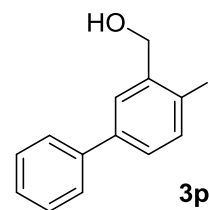

$^1\text{H}$  NMR (300MHz,  $\text{CDCl}_3$ ): 7.90 (d,  $J = 8.2$  Hz, 1H), 7.71 (d,  $J = 2.5$  Hz, 1H), 7.63-7.57 (m, 2H), 7.52-7.40 (m, 3H), 7.27-7.21 (m, 1H), 7.71 (d,  $J = 2.5$  Hz, 2H), 2.05 (t,  $J = 2.5$  Hz, 1H).

$^{13}\text{C}$  NMR (75MHz,  $\text{CDCl}_3$ ): 143.2, 142.0, 140.2, 139.8, 129.2, 128.2, 127.5, 127.2, 96.2, 69.6.

MS (EI)  $\text{C}_{13}\text{H}_{11}\text{IO}$ , calculated for  $[\text{M}^+]$ : 309.98, found 309.97.

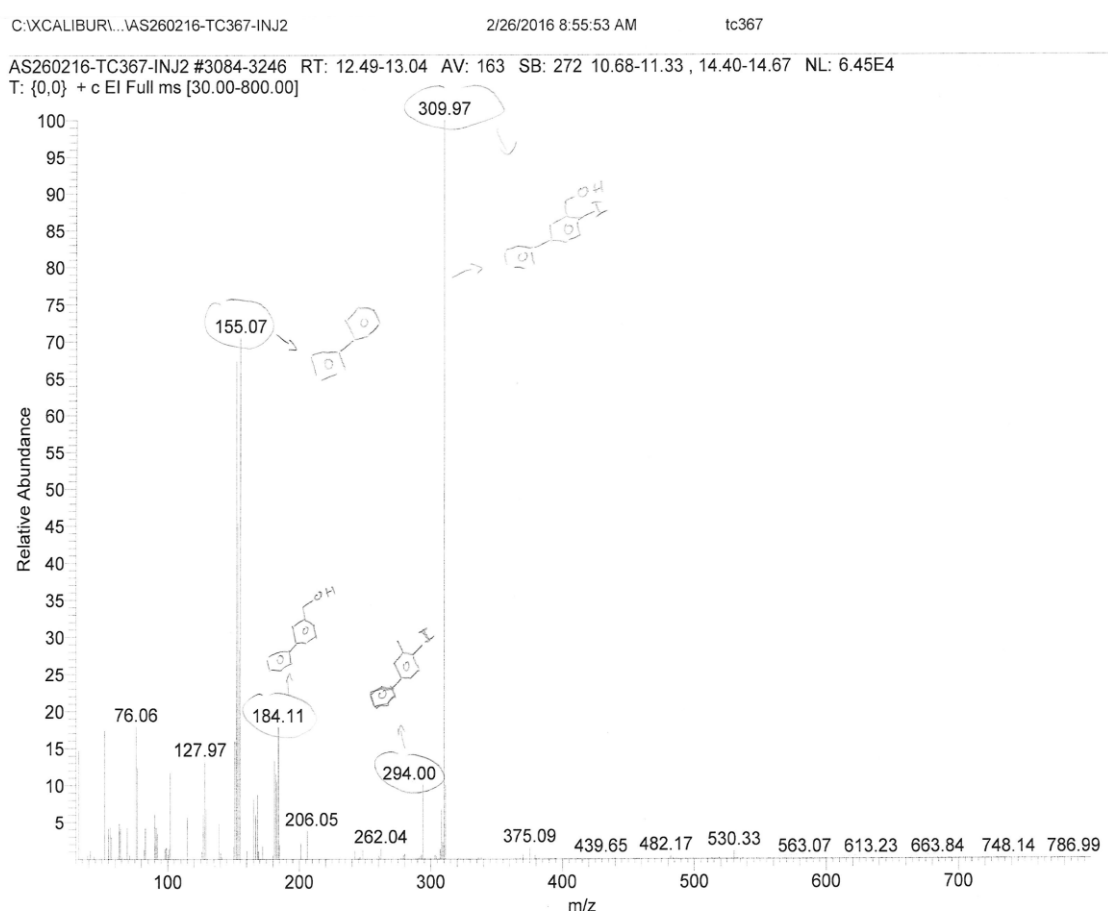

### 3'-(Hydroxymethyl)-4'-iodo-1,1'-biphenyl-3-ol **3q**

The residue was purified by silica gel flash chromatography (50/50:cyclohexane/diethyl ether) affording **3q** as a white solid (*conditions R*: 37 mg, 47% yield; *conditions A*: 24 mg, 29% yield; *Felgin's conditions (Pd)*: 15 mg, 15% yield).

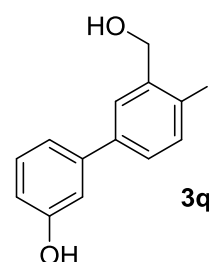

$^1\text{H}$  NMR (300MHz,  $\text{CDCl}_3$ ): 7.85 (d,  $J = 8.26$  Hz, 1H); 7.65 (d,  $J = 2.33$  Hz, 1H); 7.32-7.25 (m, 1H); 7.21-7.16 (m, 1H); 7.15-7.11 (m, 1H); 7.04-7.01 (m, 1H); 6.84-6.79 (m, 1H); 4.72 (s, 2H)/

$^{13}\text{C}$  NMR (75MHz,  $\text{CDCl}_3$ ): 160.5, 155.8, 143.0, 139.3, 130.0, 127.7, 126.9, 119.3, 114.5, 113.7, 96.0, 69.5.

MS (FD+{eiFi})  $\text{C}_{13}\text{H}_{11}\text{IO}_2$ , calculated for  $[\text{M}^+]$ : 325.9804, found 325.9809.

### 1- $^{13}\text{C}$ -5-Phenylisobenzofuran-1(3H)-one **7**

White solid.

$^1\text{H}$  NMR (300MHz,  $\text{CDCl}_3$ ): 7.96 (dd,  $J=8.0$  Hz, 2.7 Hz, 1H), 7.72 (d,  $J=8.0$  Hz, 1H), 7.65 (s, 1H), 7.62-7.58 (m, 2H), 7.51-7.41 (m, 3H), 5.35 (d,  $J=2.1$  Hz, 2H).

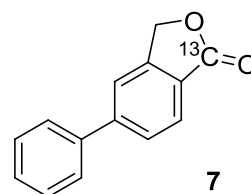

$^{13}\text{C}$  NMR (75MHz,  $\text{CDCl}_3$ ): 171.2 ( $^{13}\text{C}$ -enriched), 147.6, 129.3, 128.8, 128.7, 128.6, 127.7, 126.3, 126.2, 120.8, 120.8, 69.8.

HRMS (IC)  $\text{C}_{13}^{13}\text{CH}_{10}\text{O}_2$ , calculated for  $[\text{M}^+]$ : 211.0714, found: 211.0719.

## D) $^1\text{H}$ and $^{13}\text{C}$ NMR Spectra

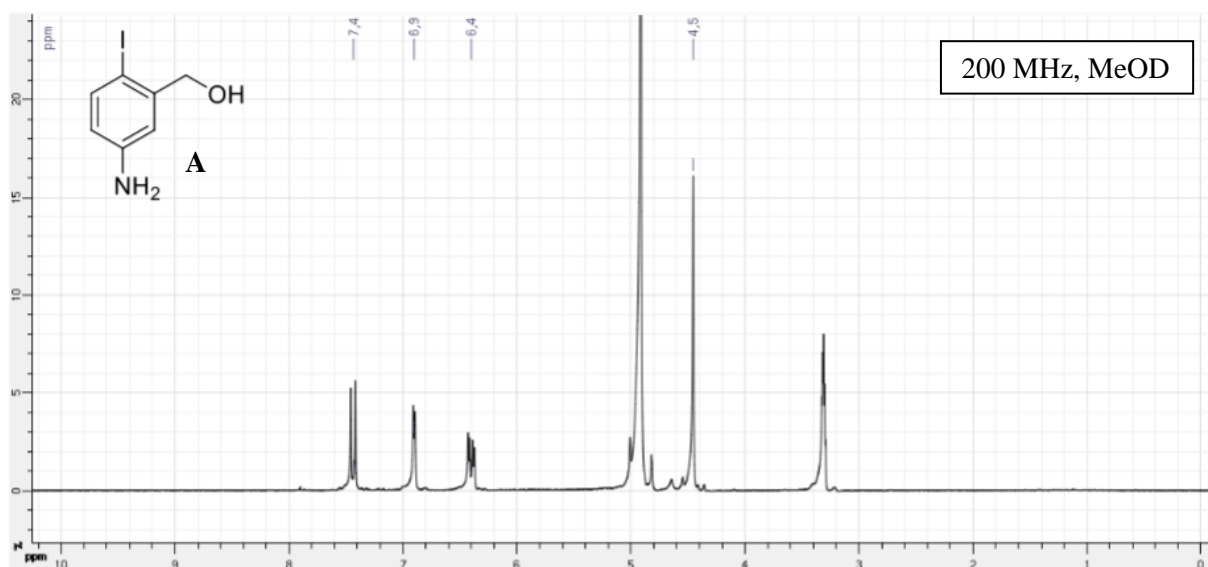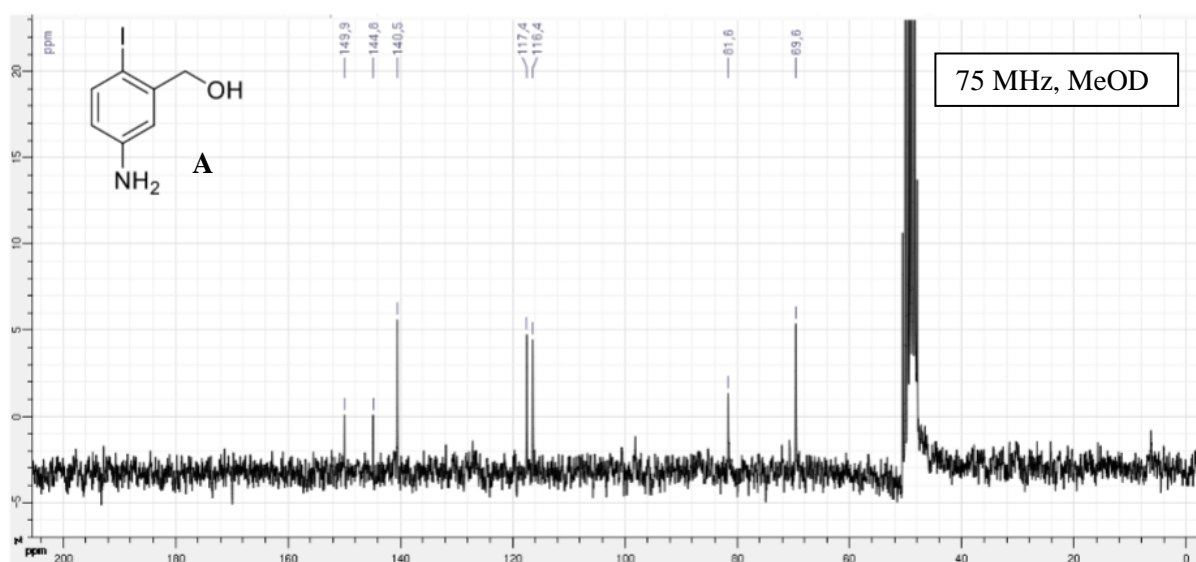

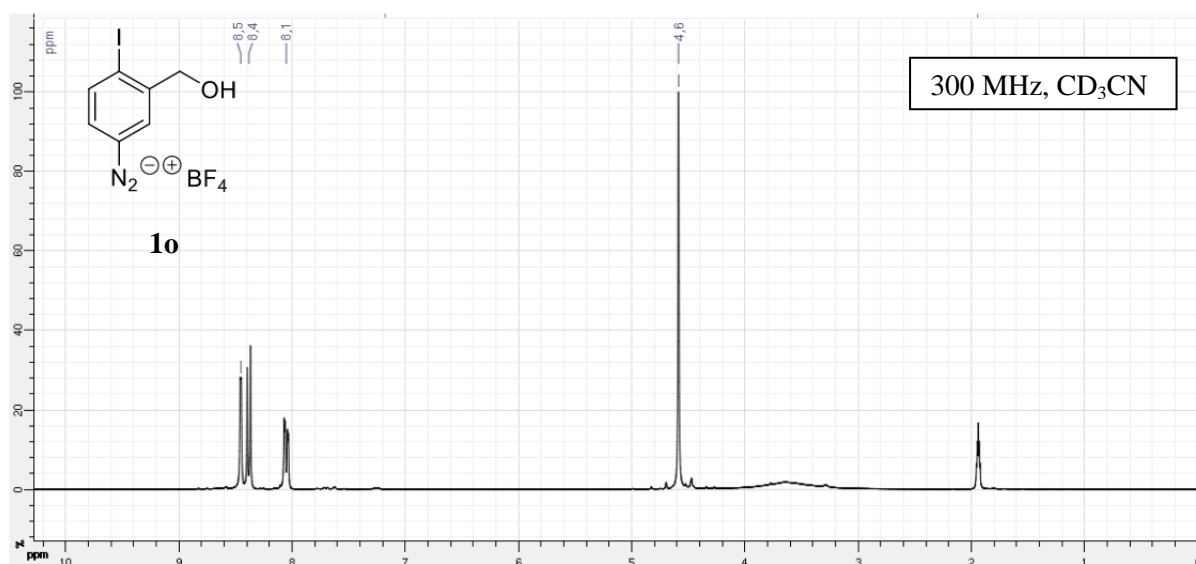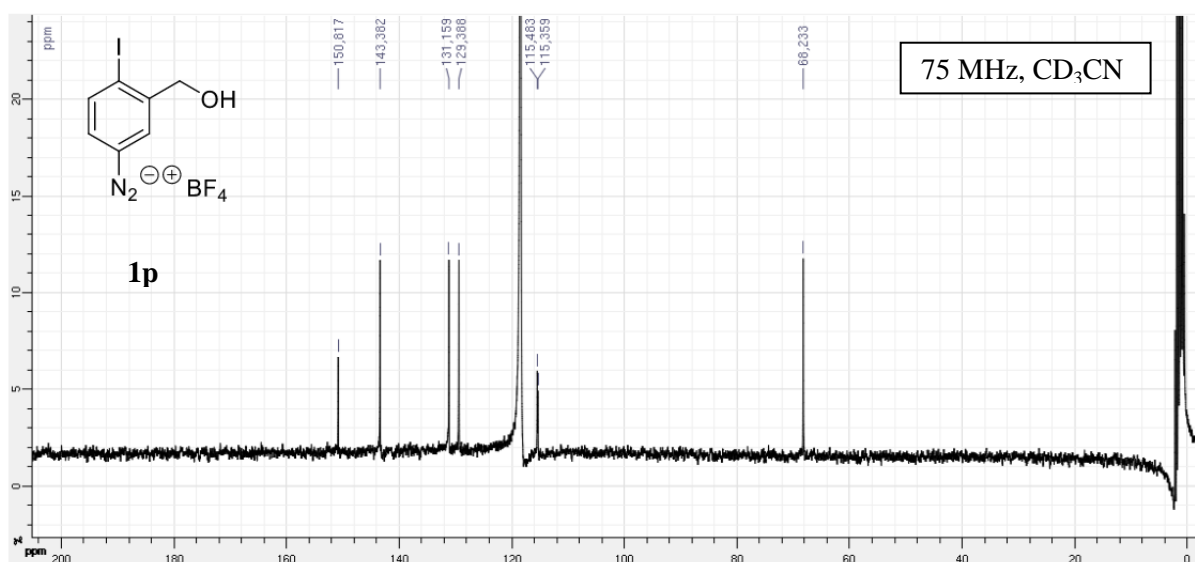

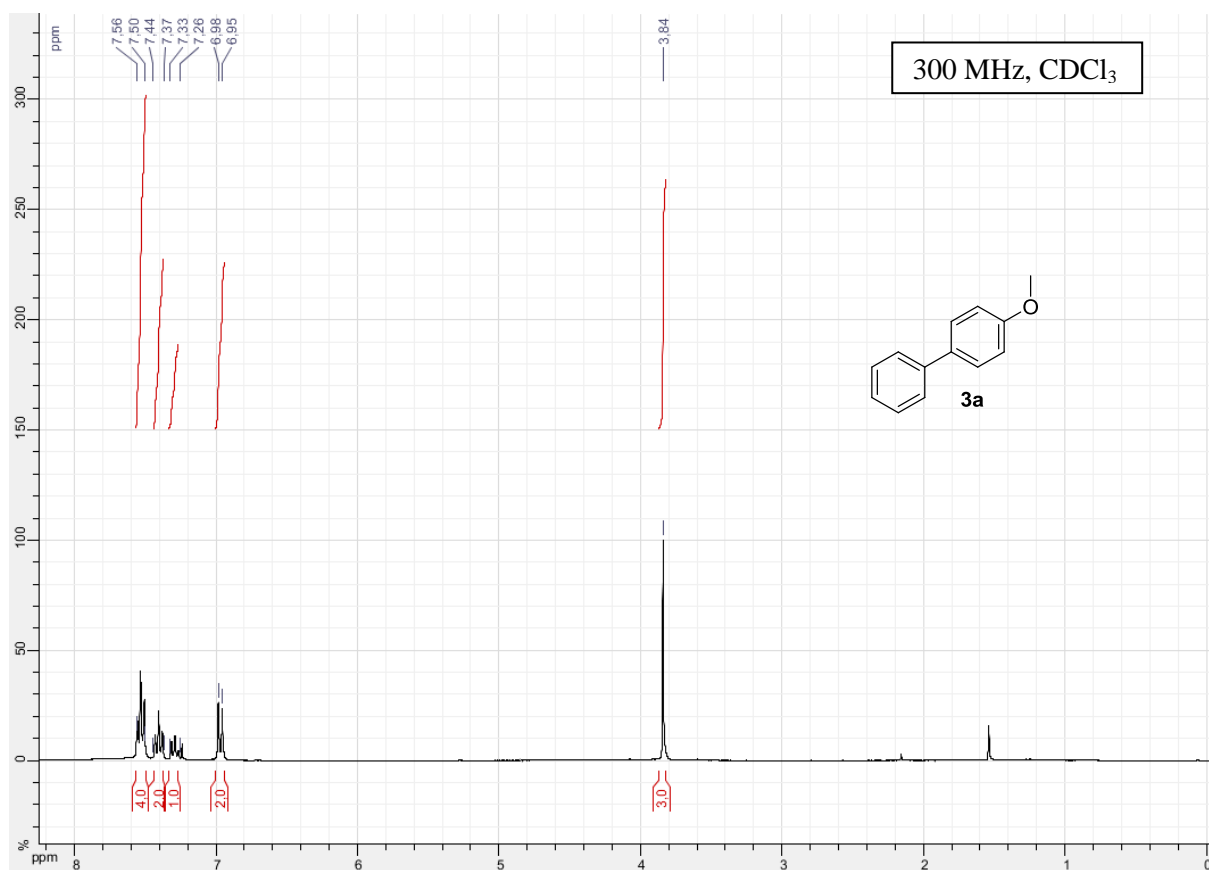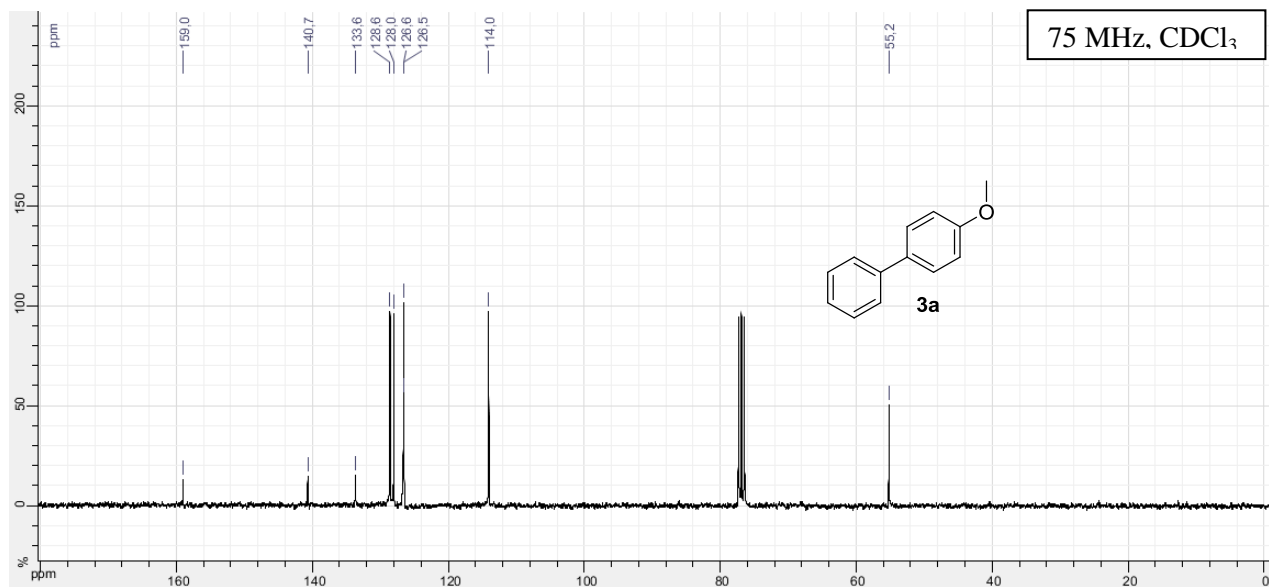

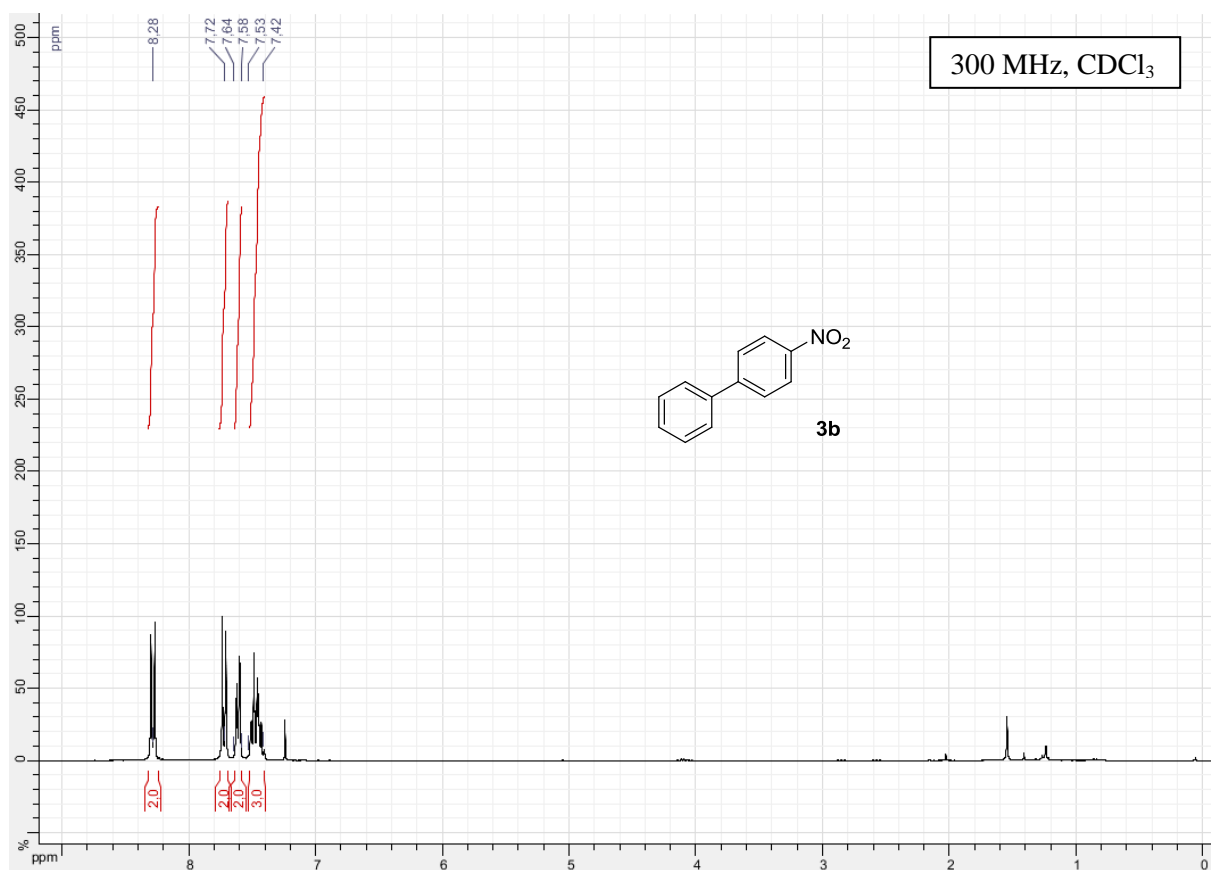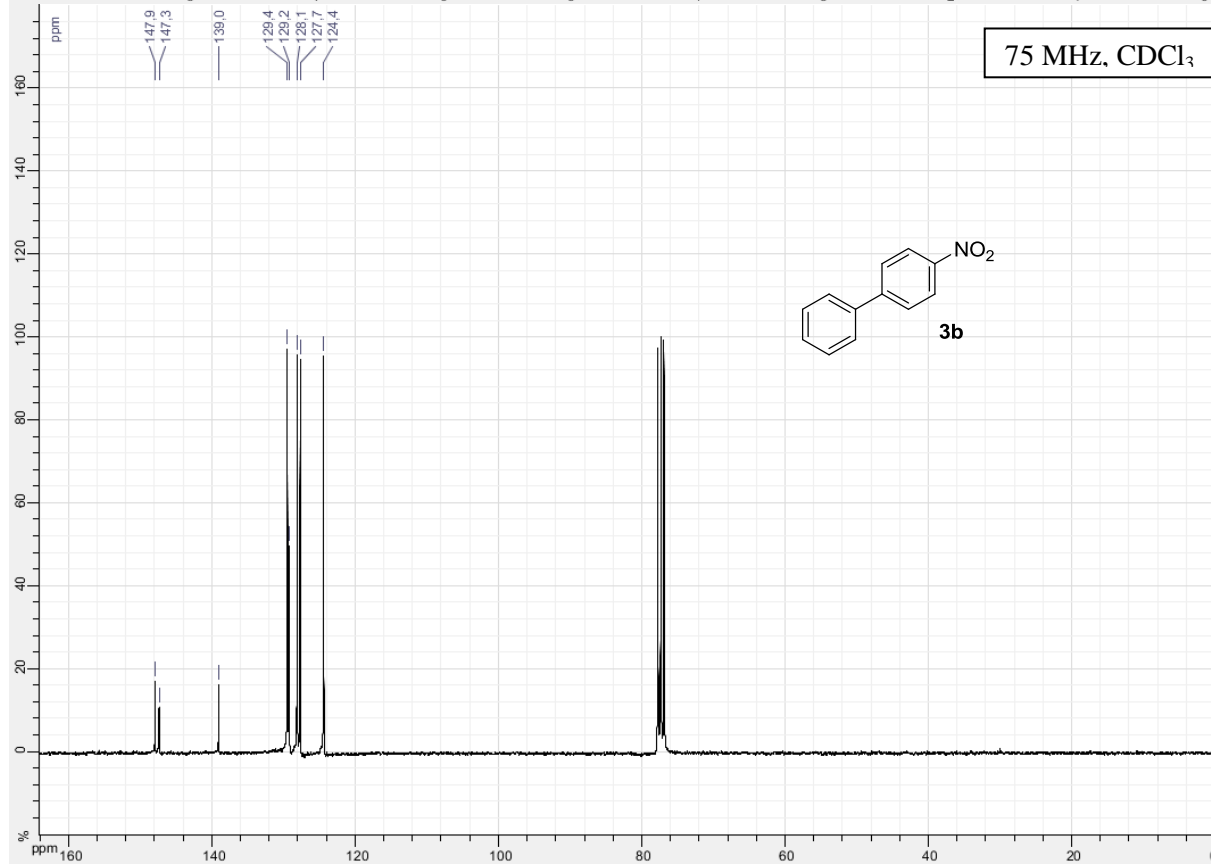



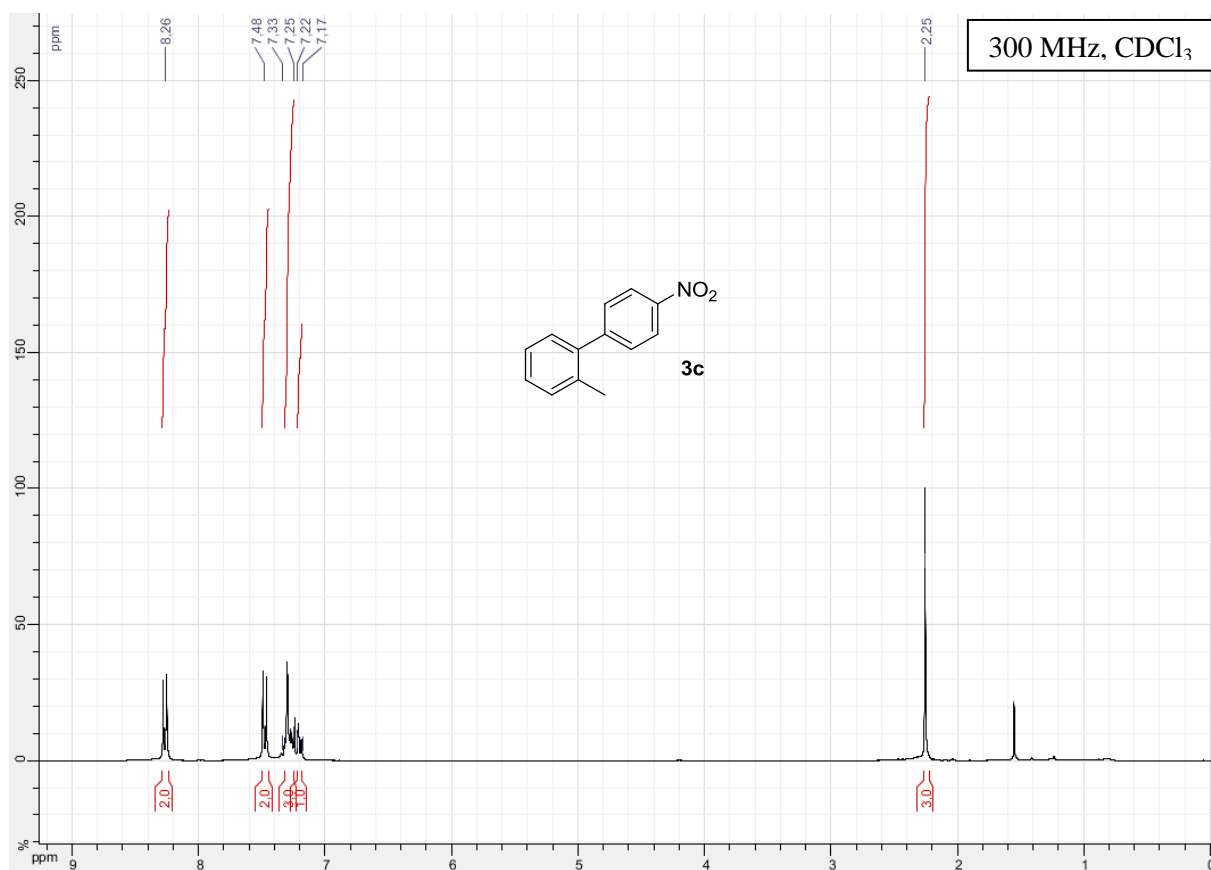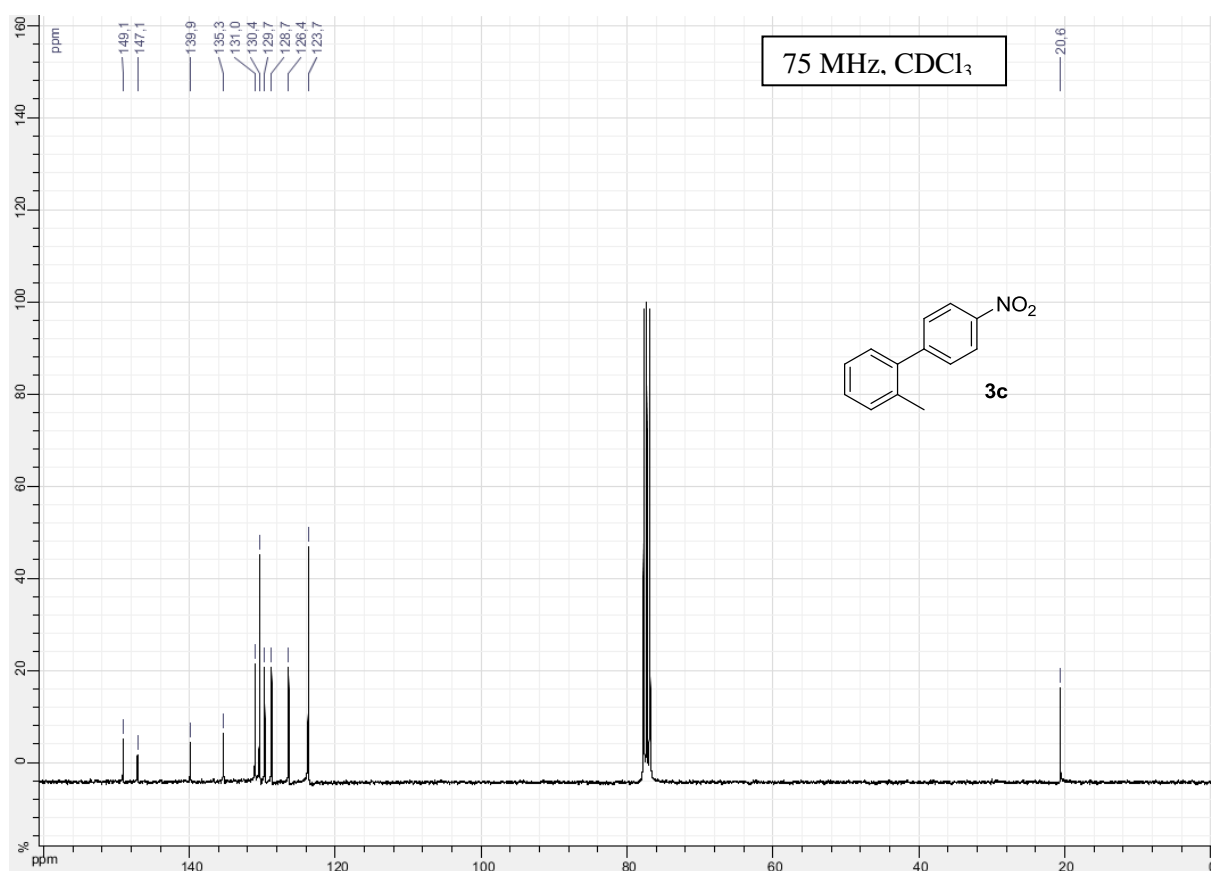

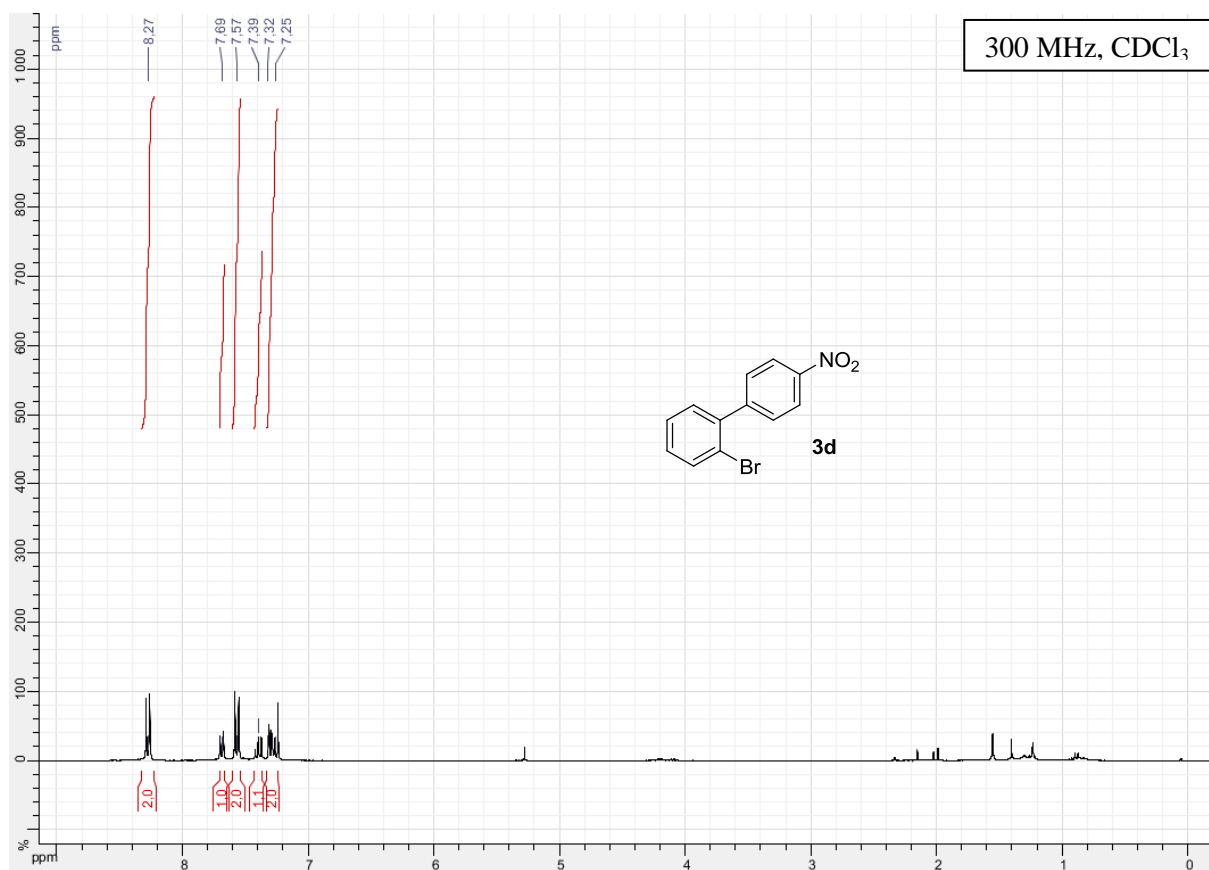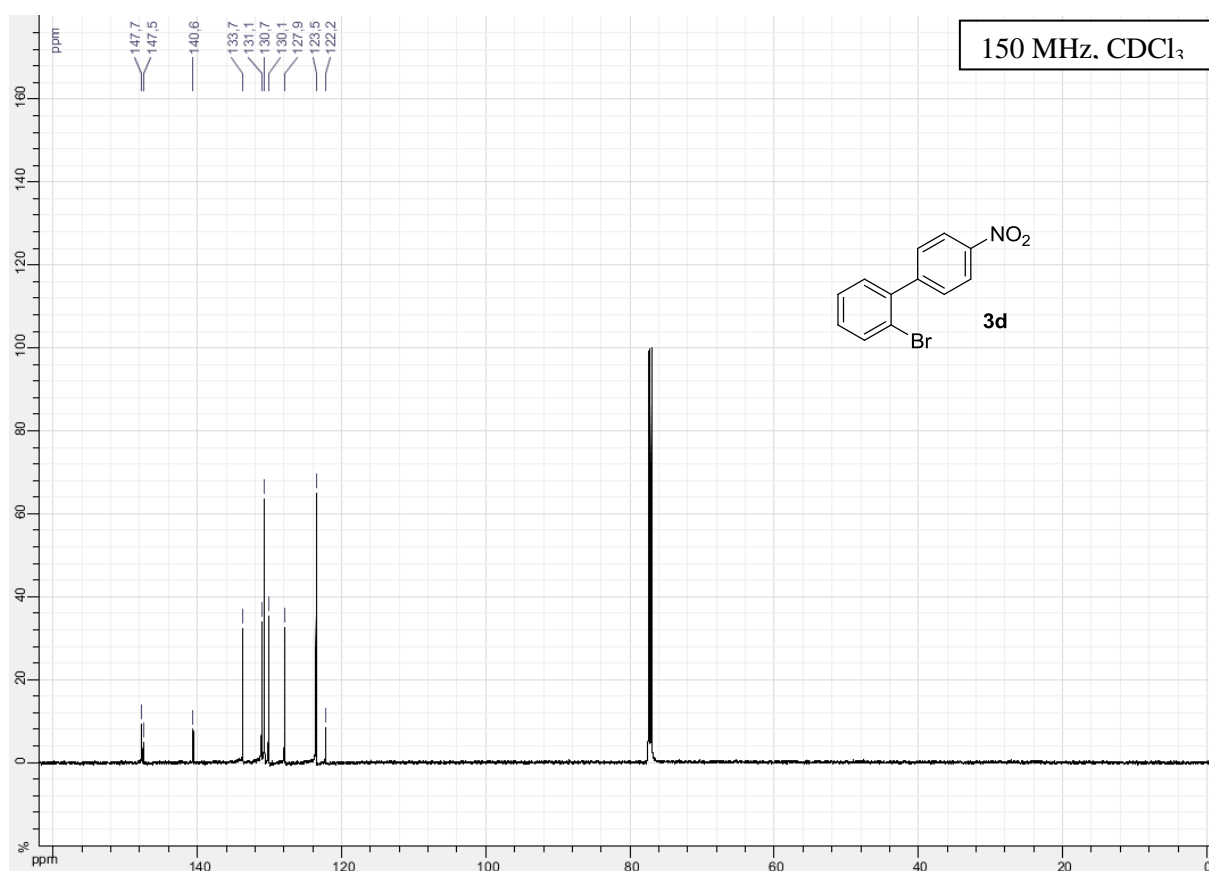

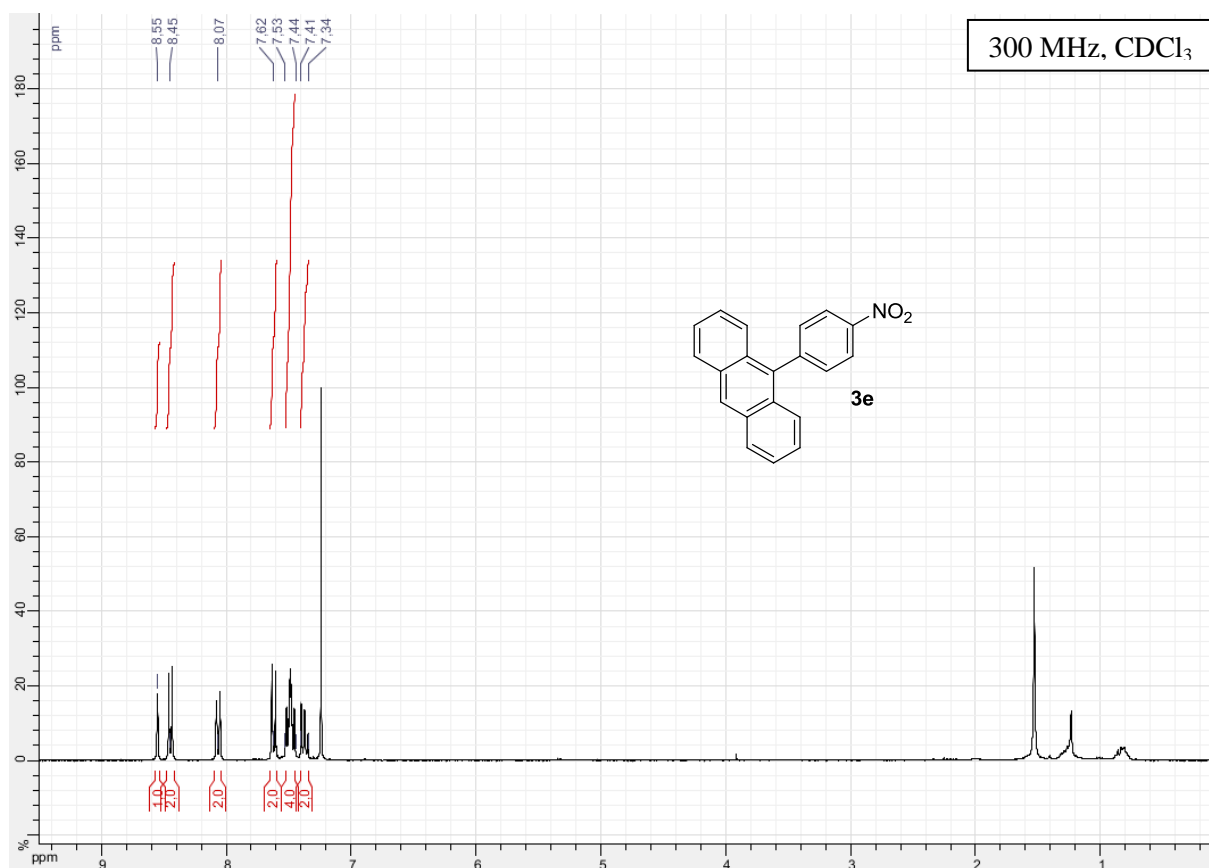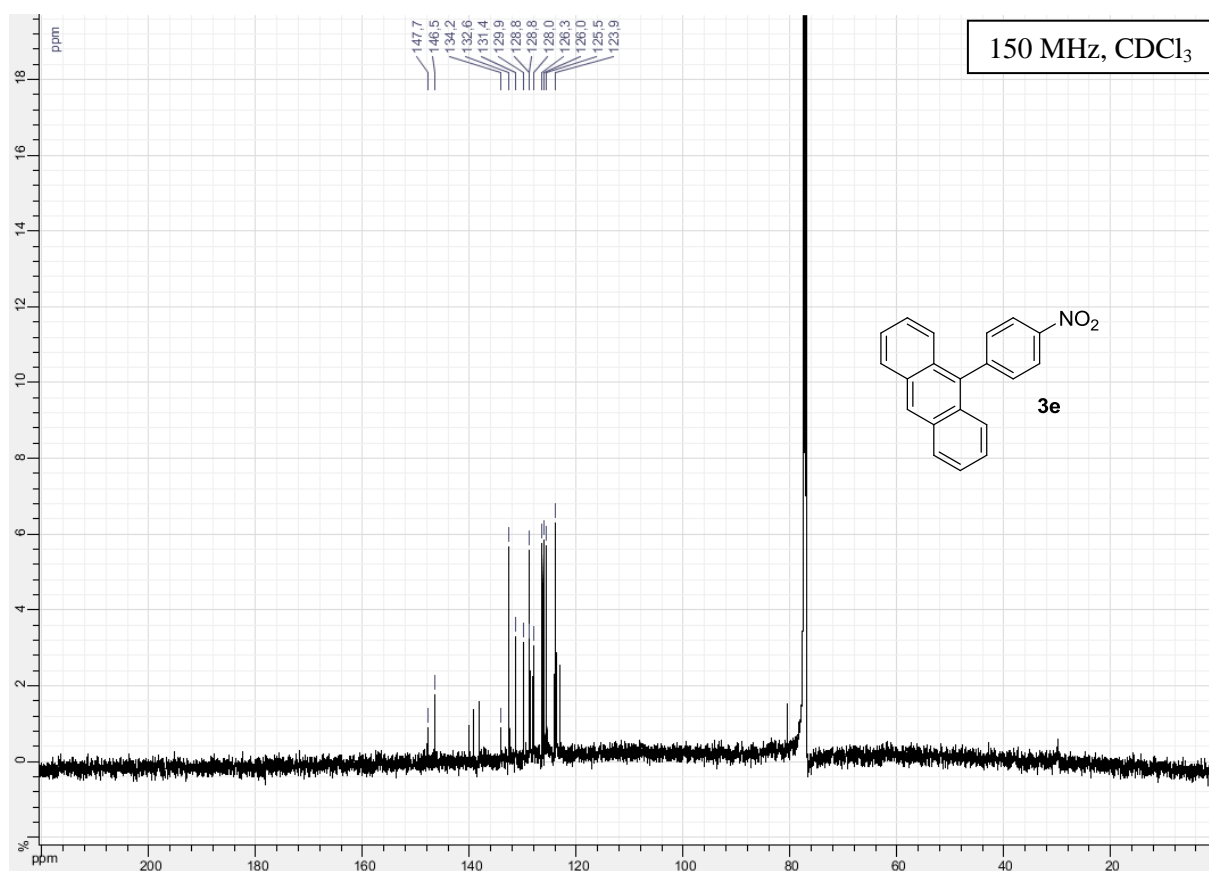

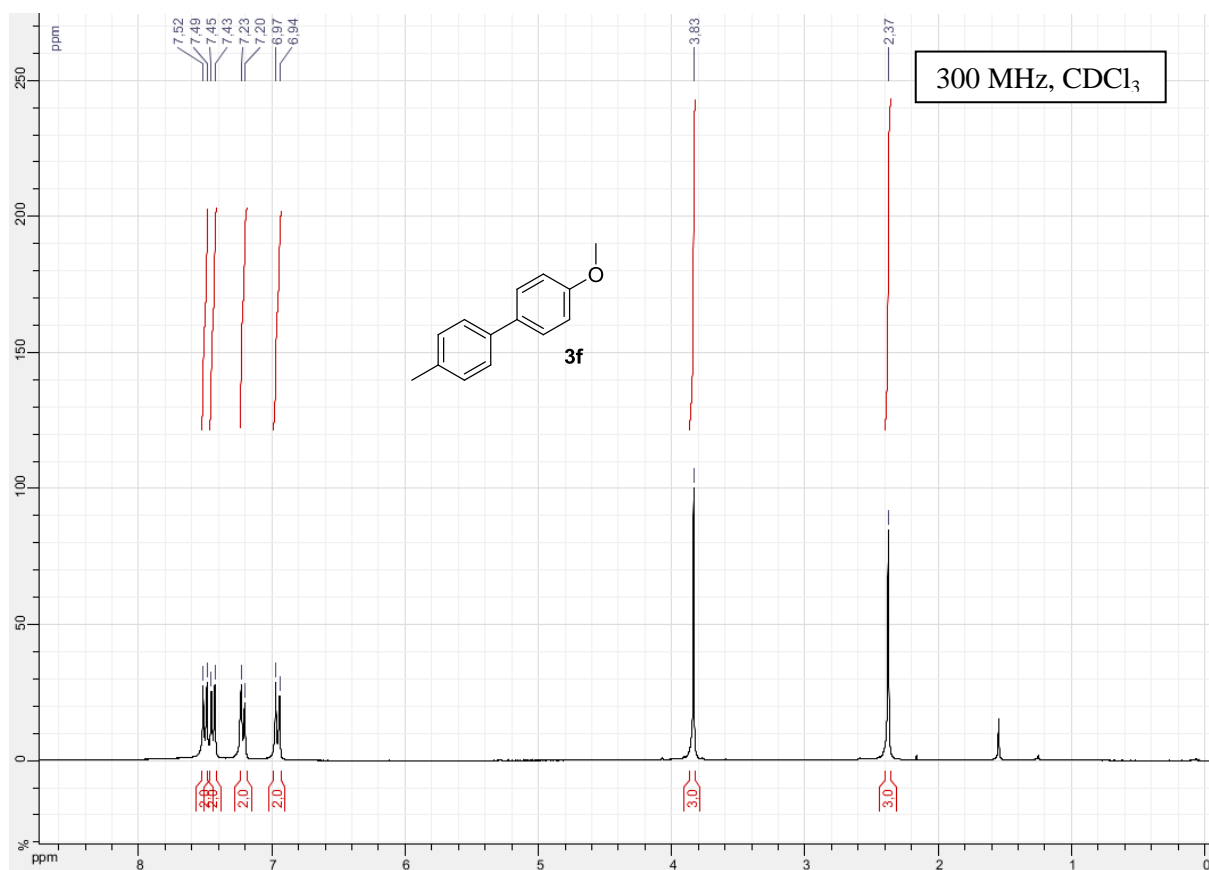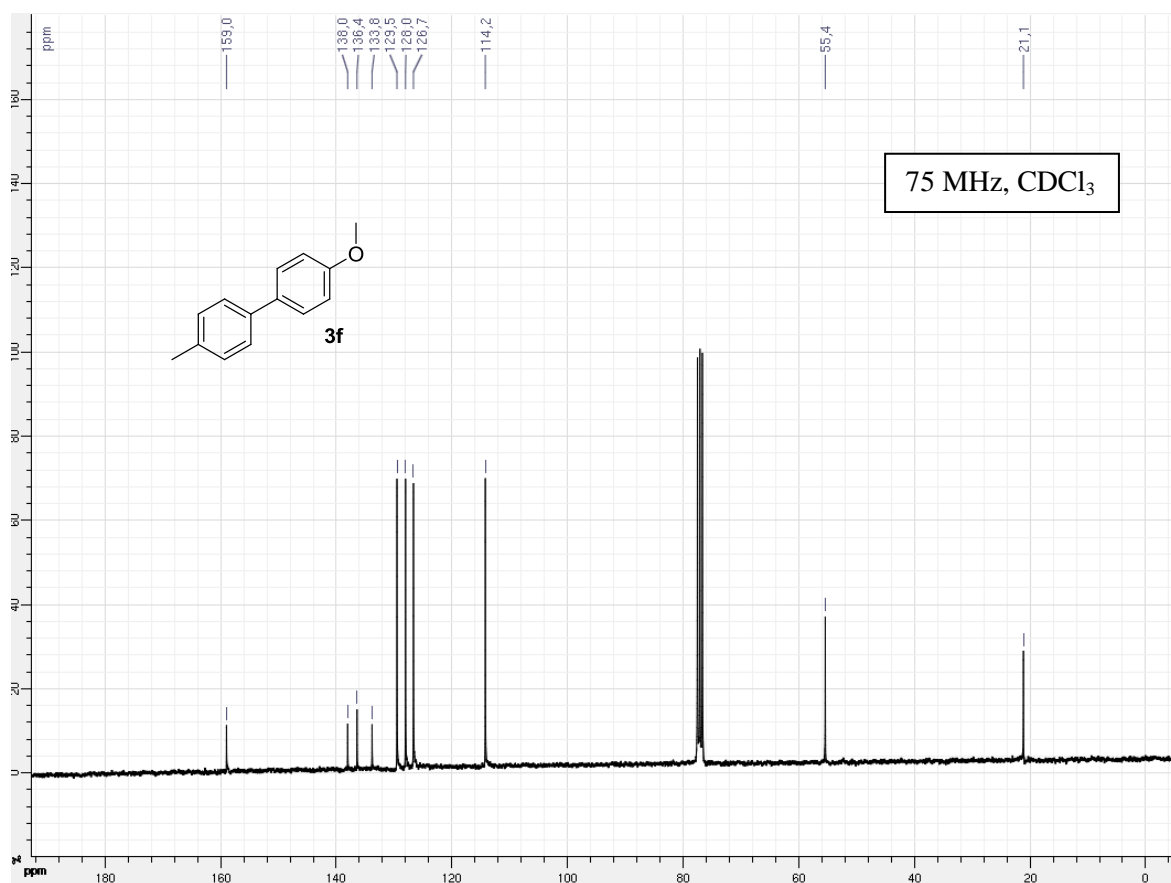

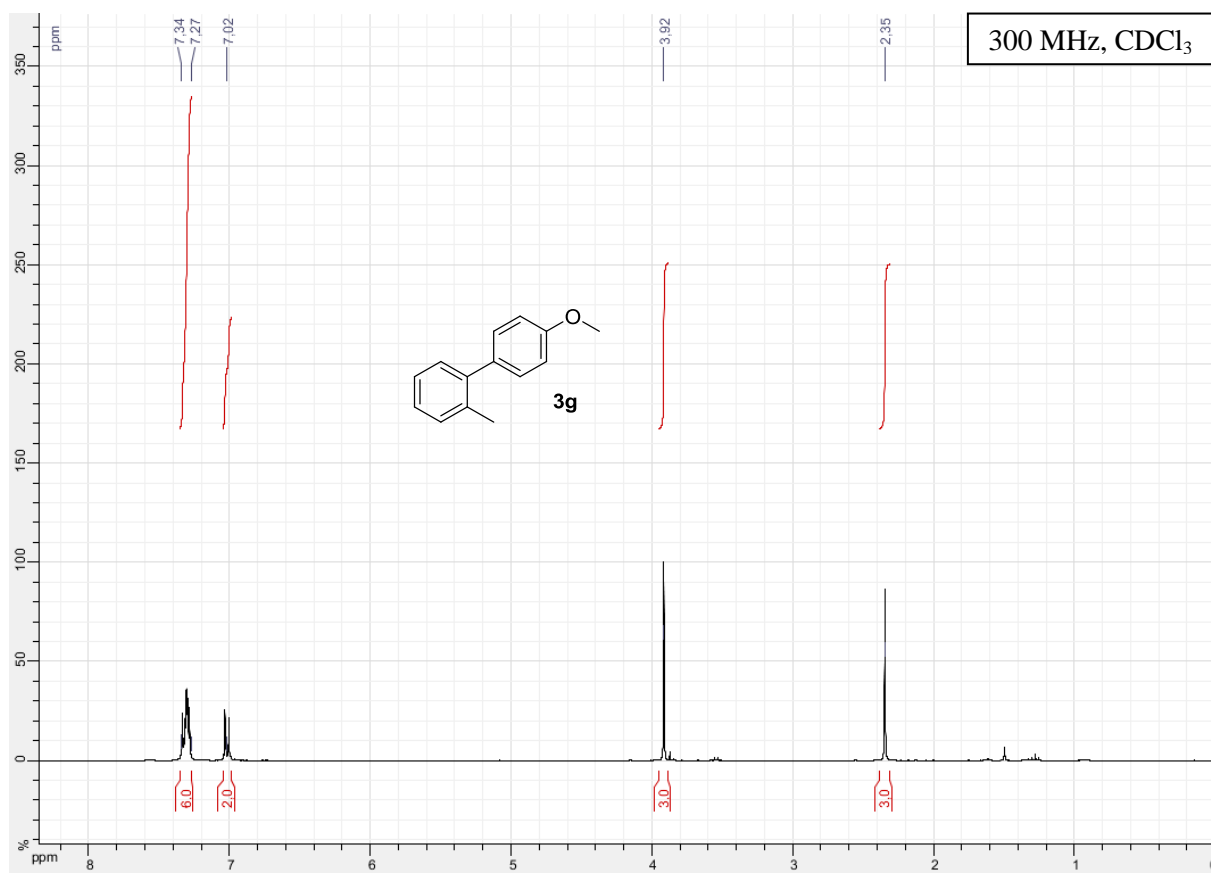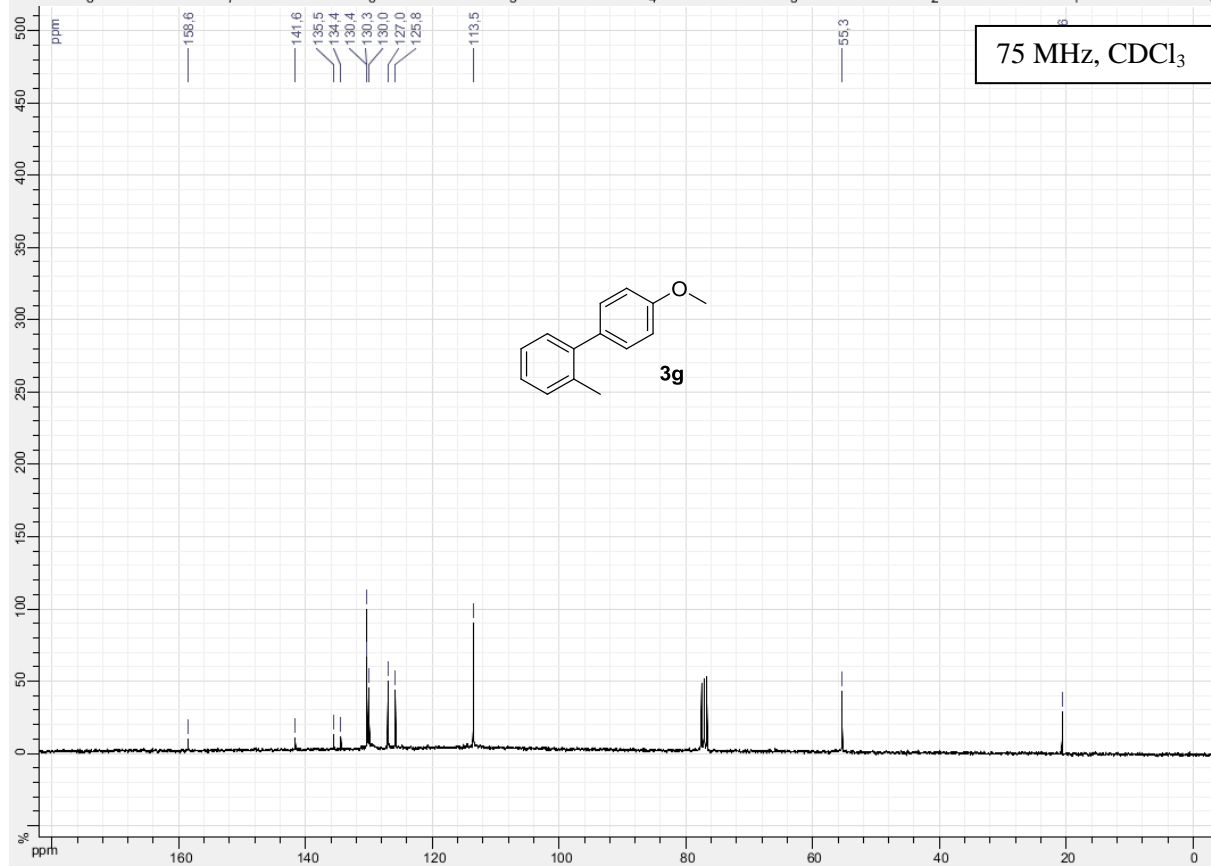

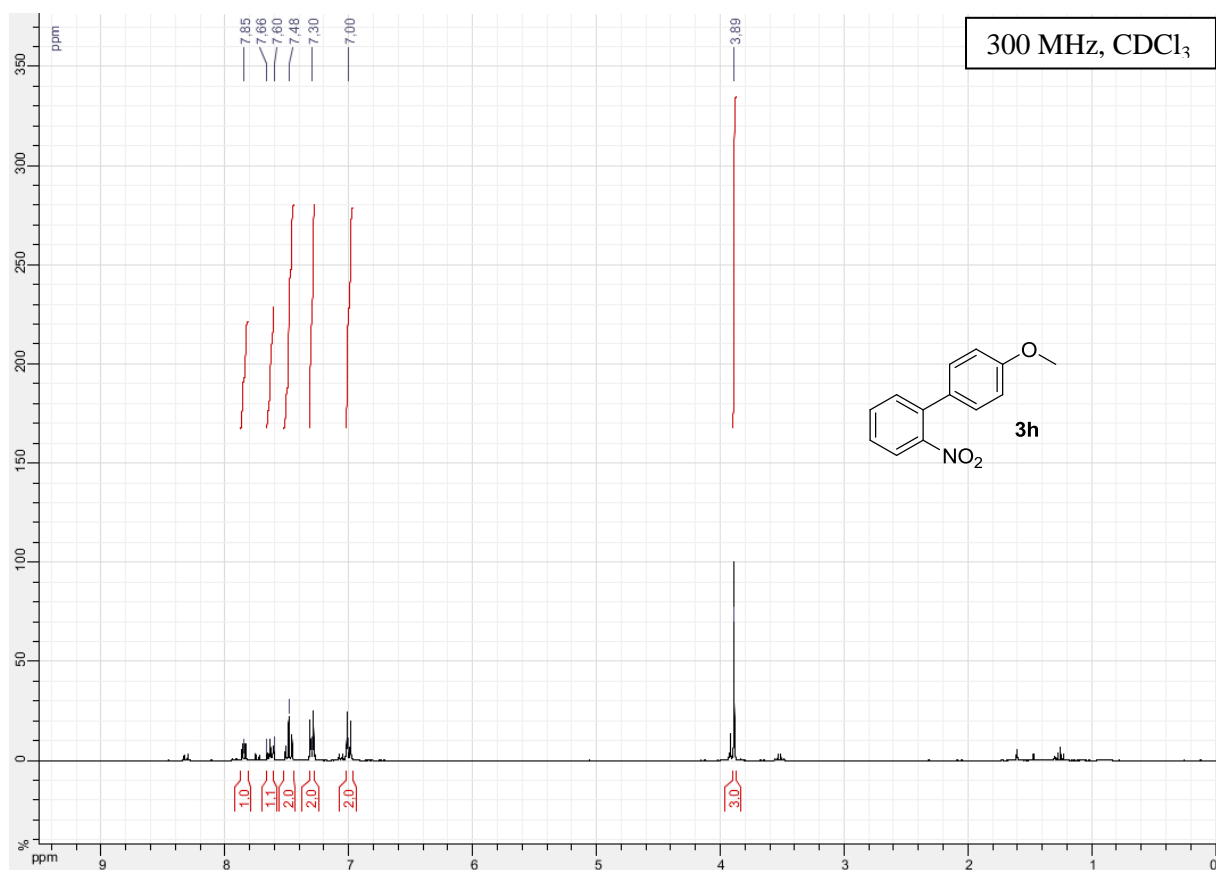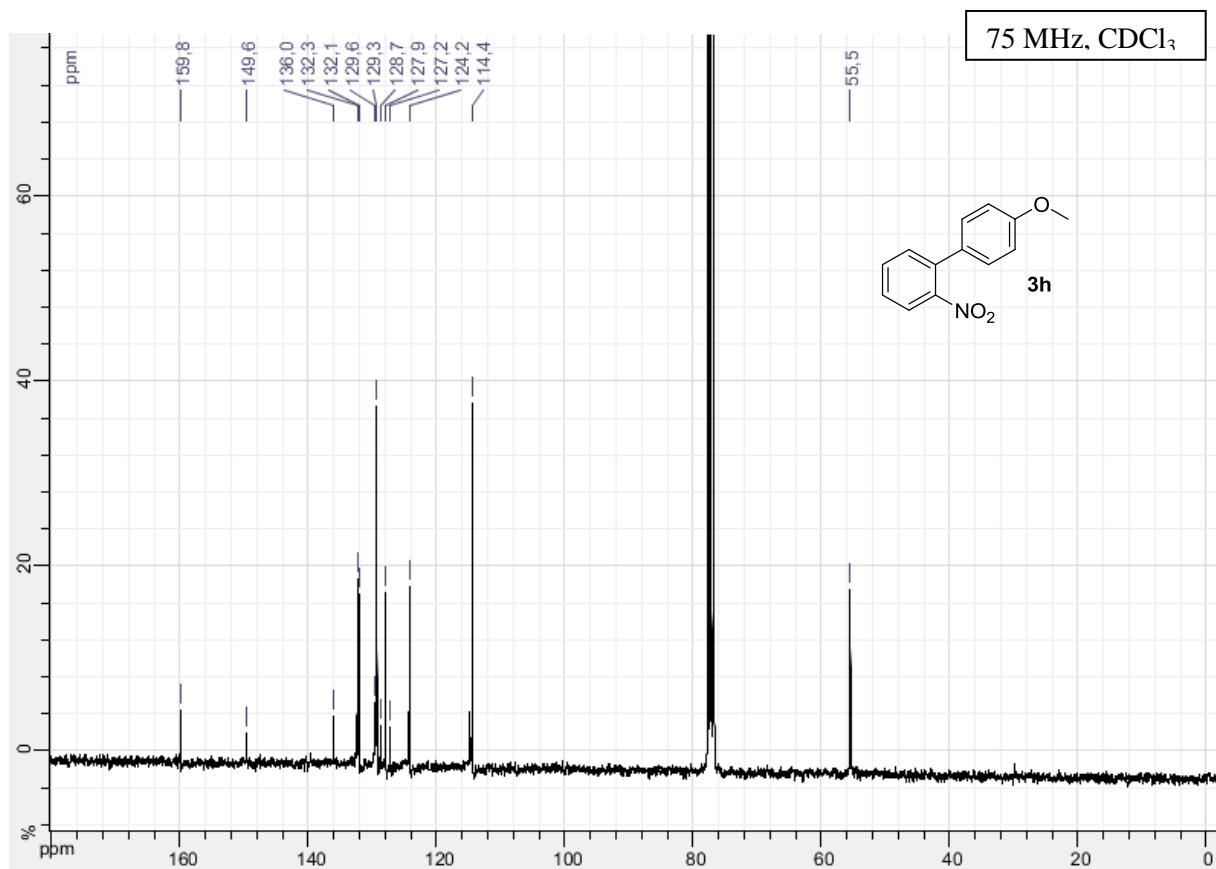

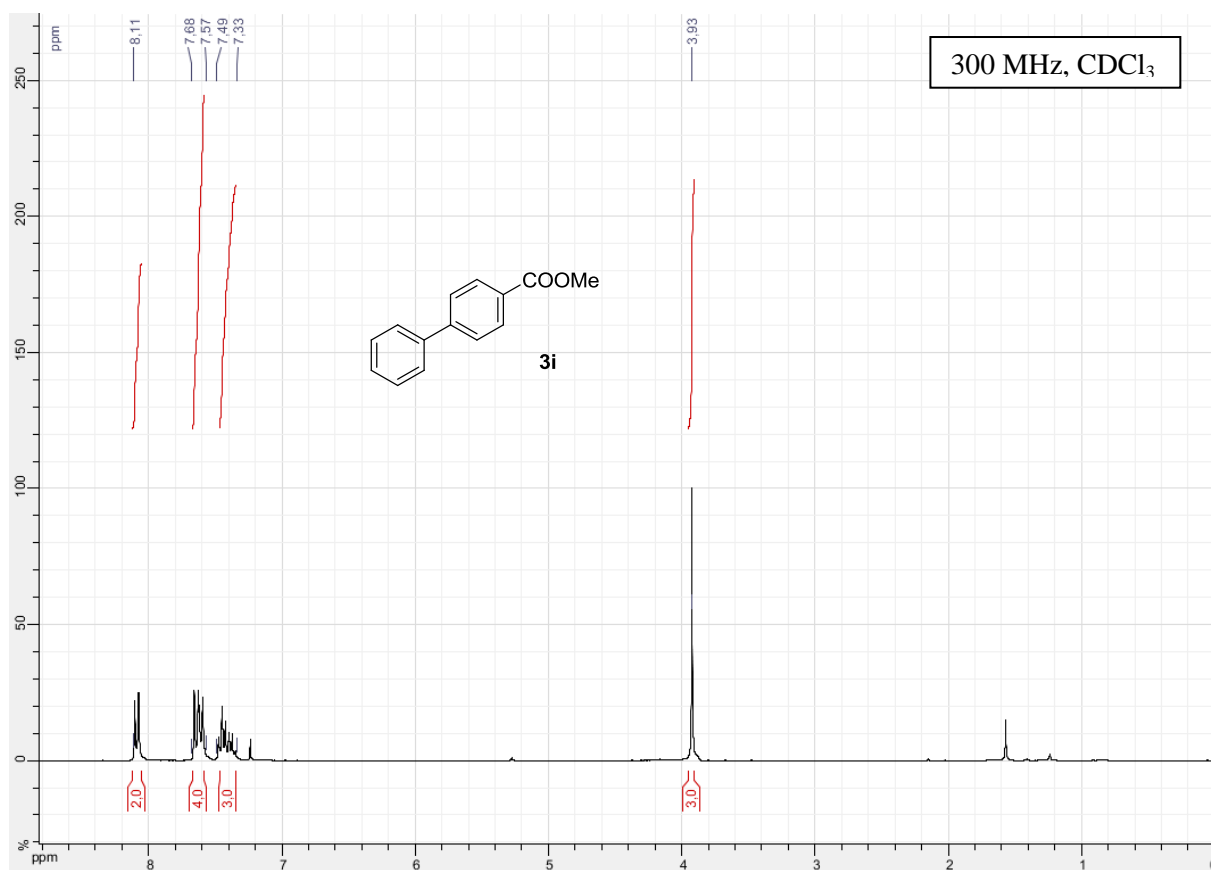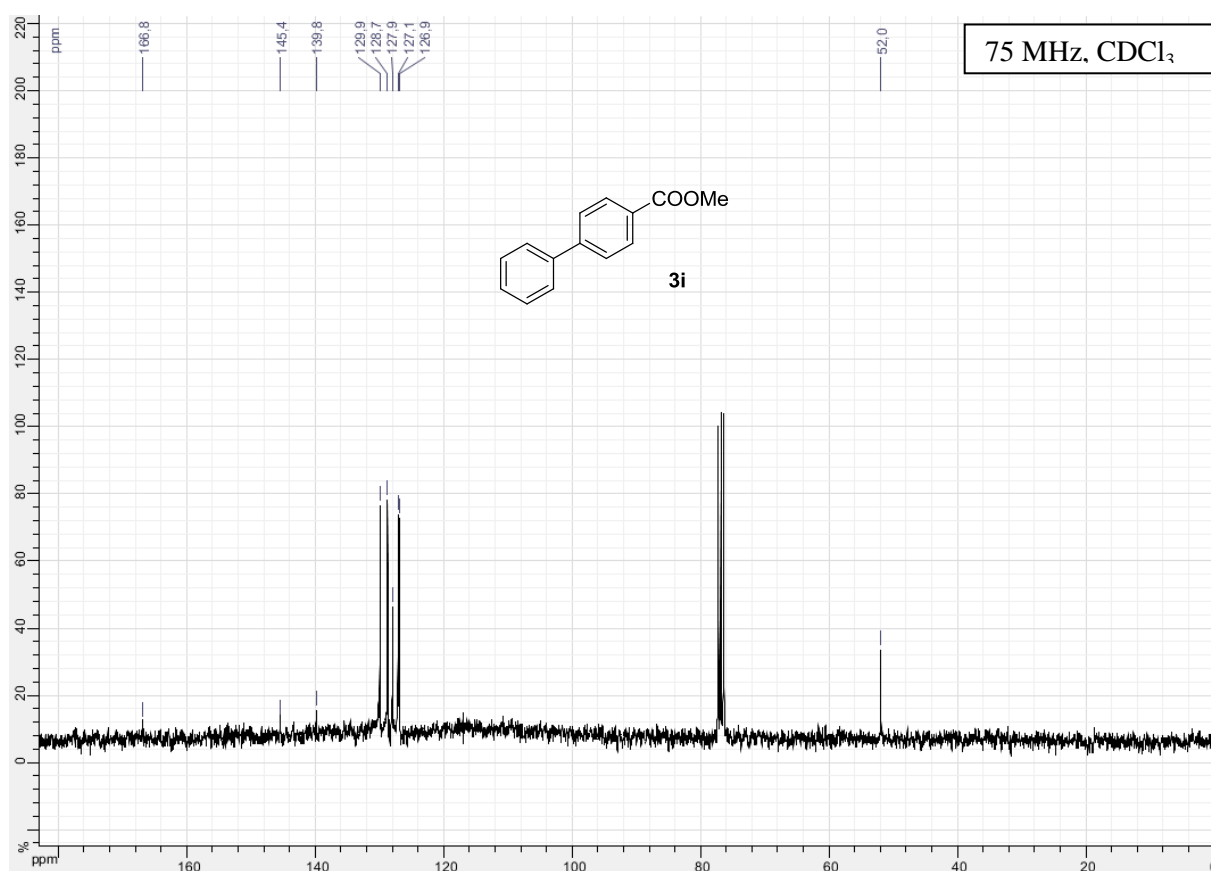

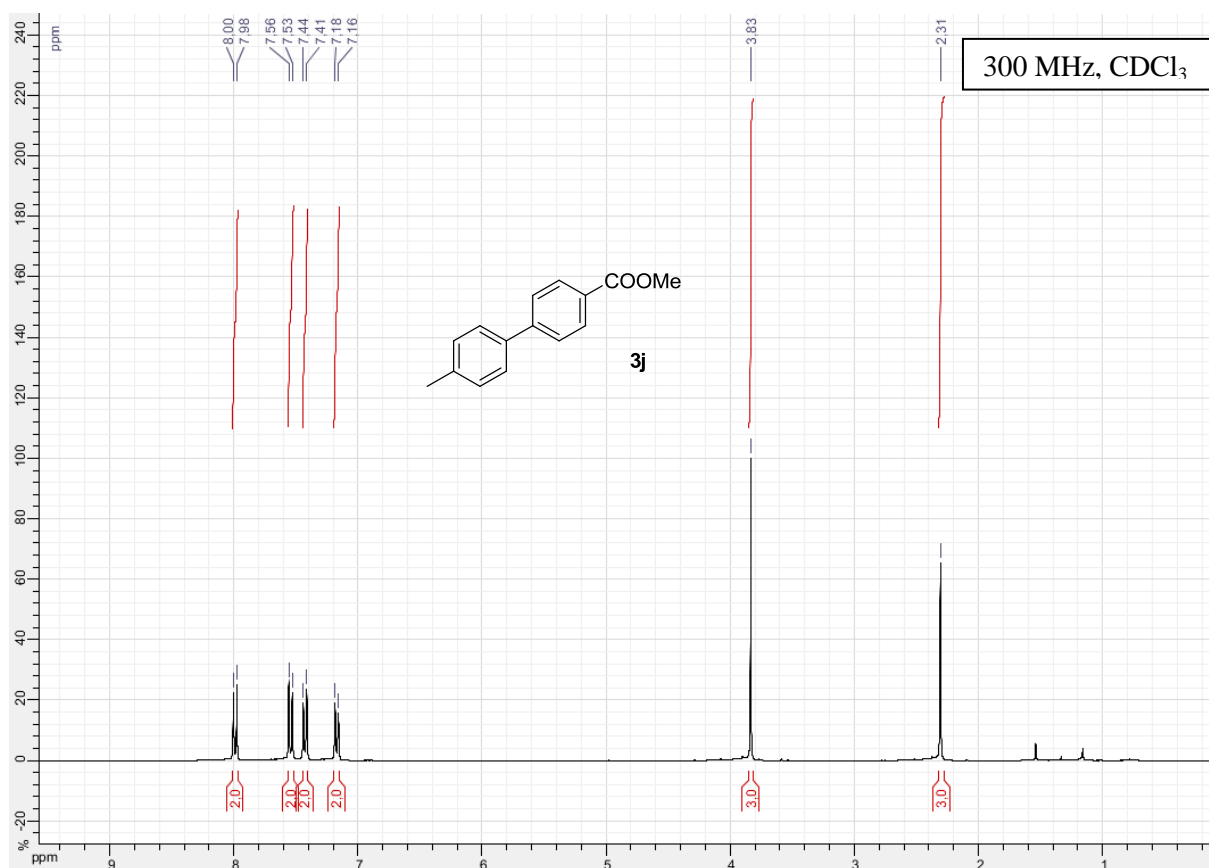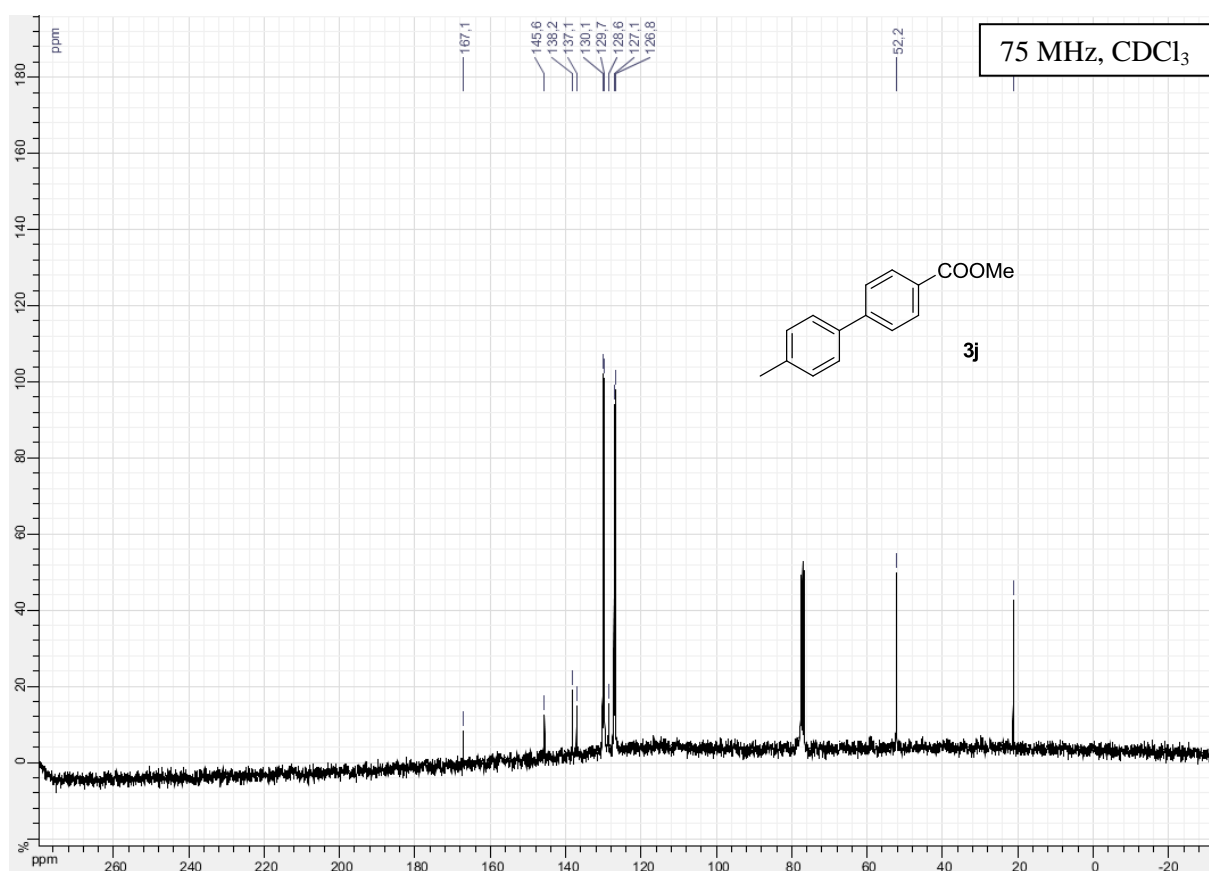



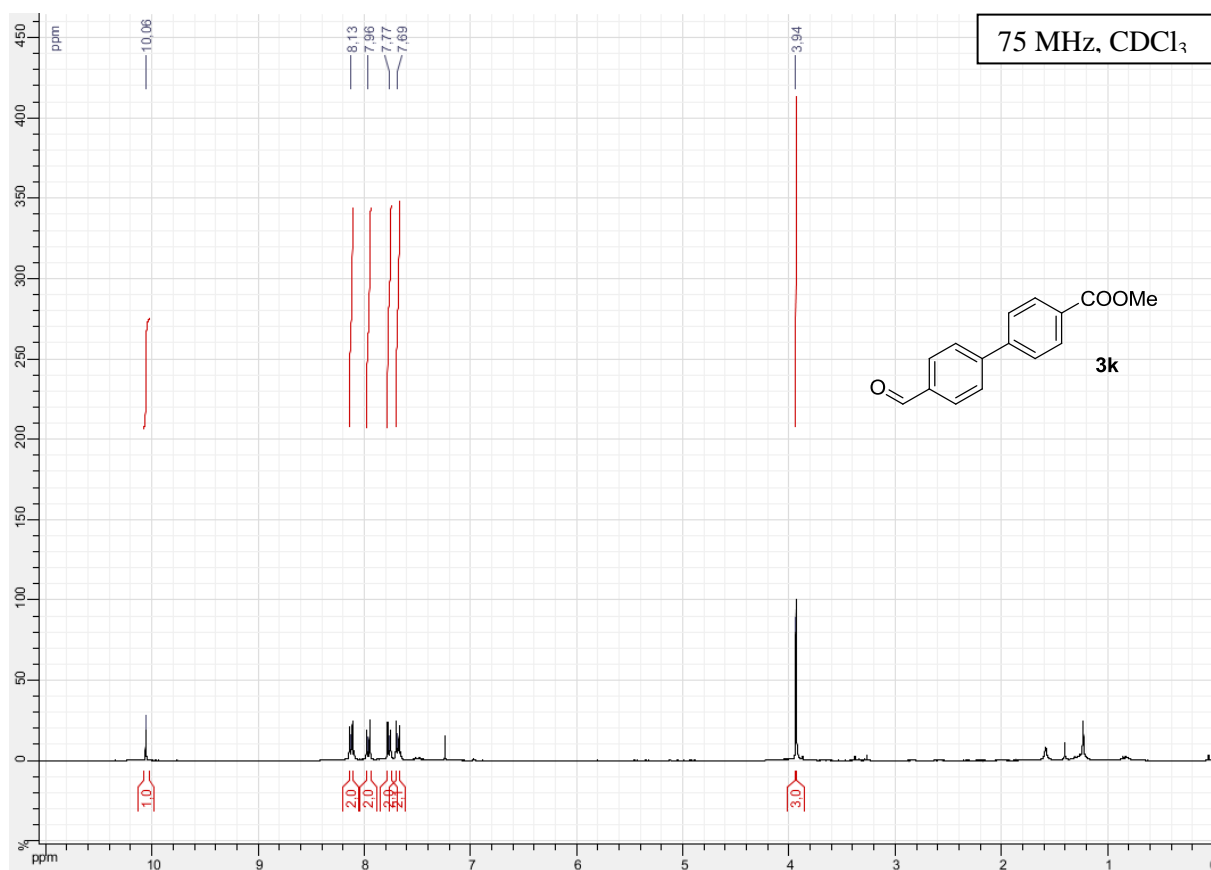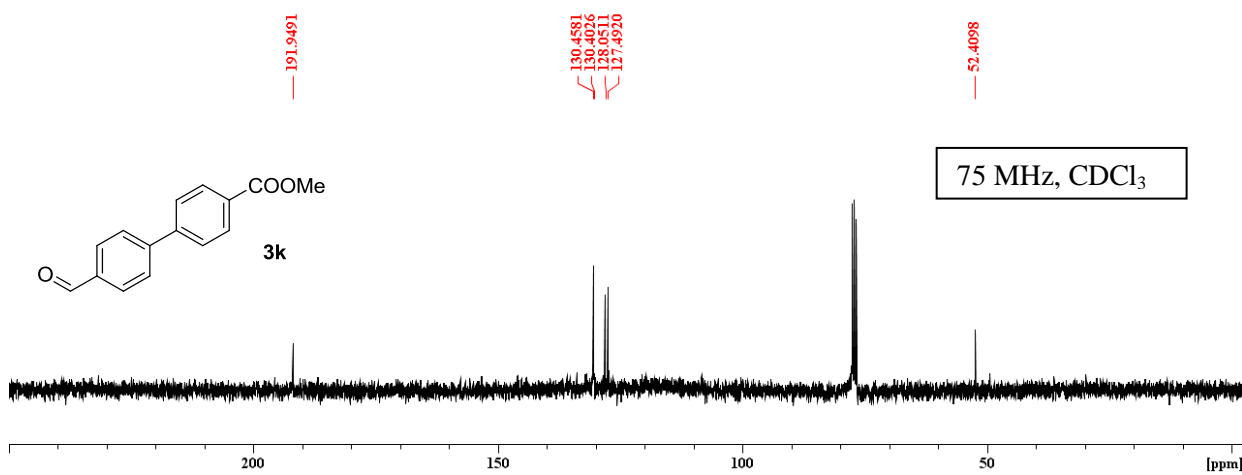

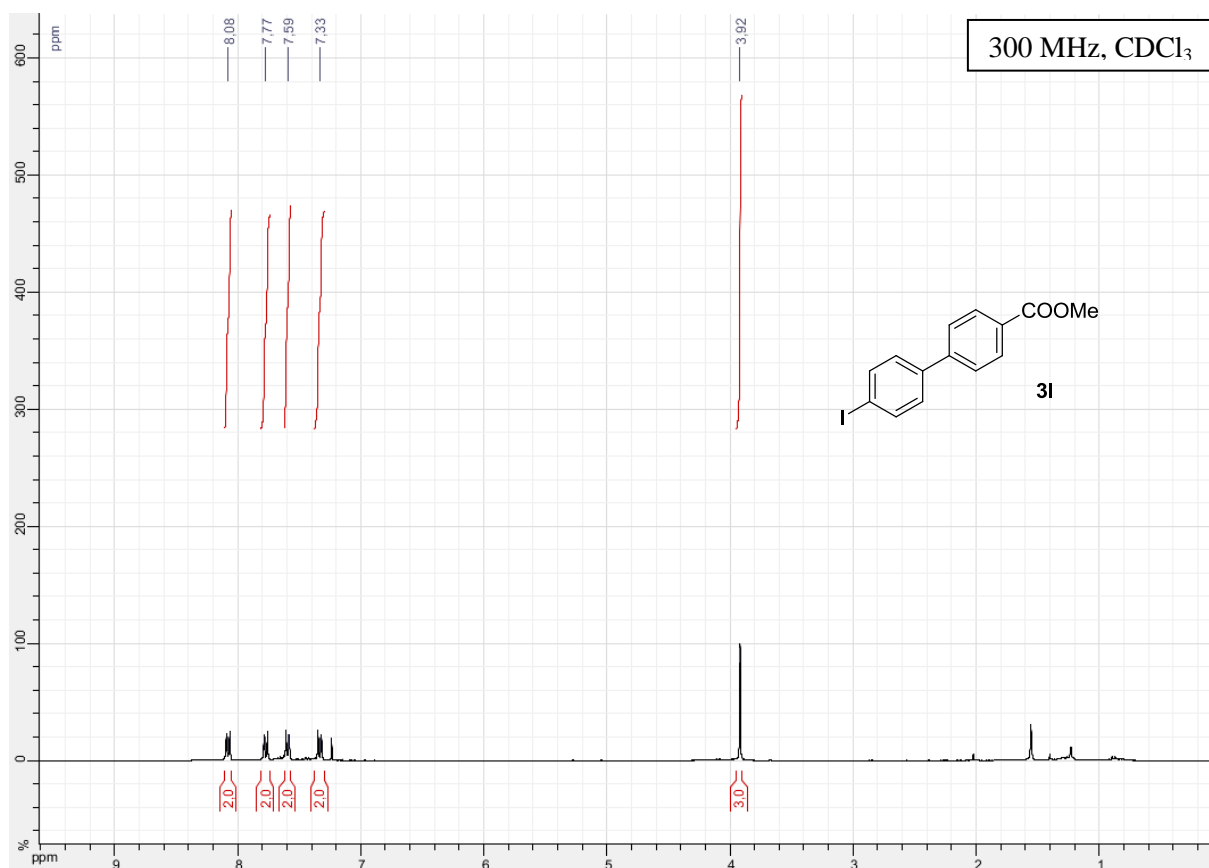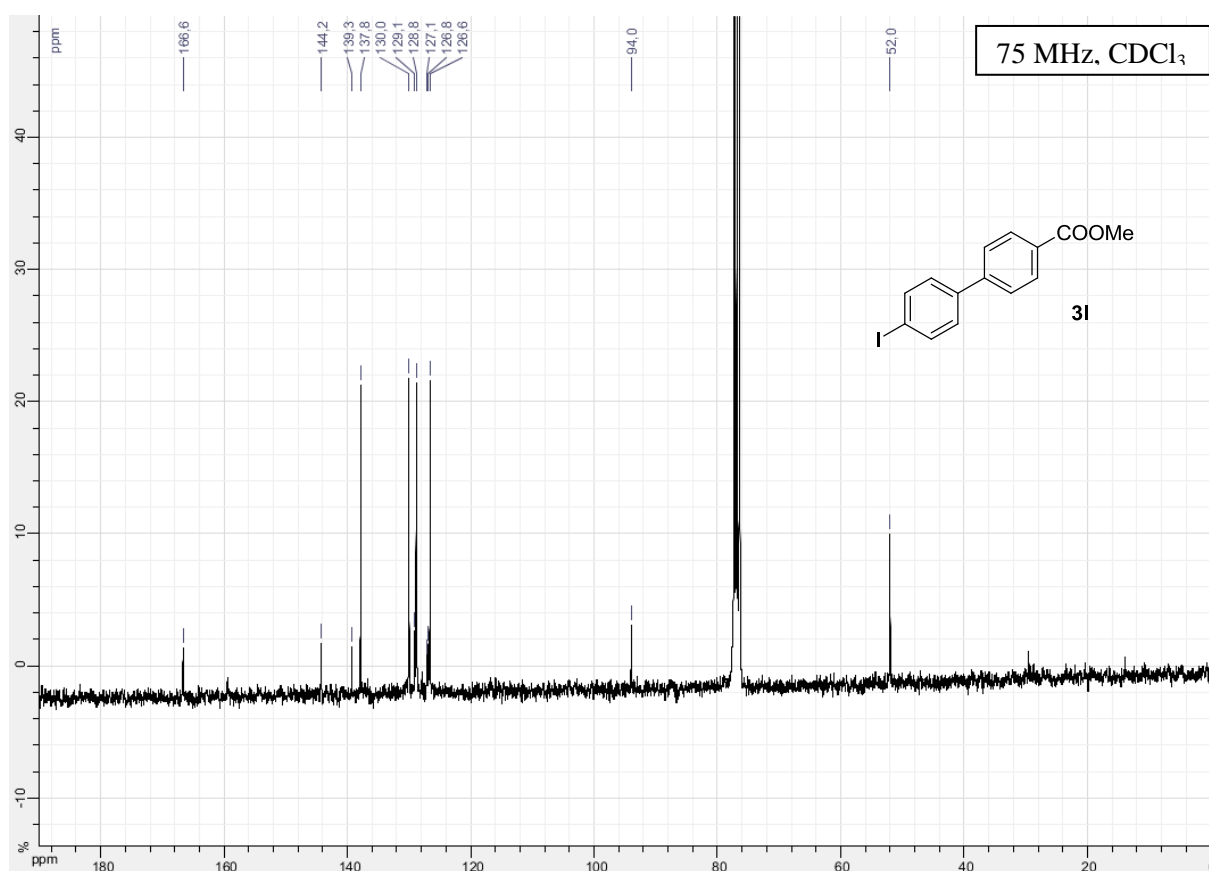

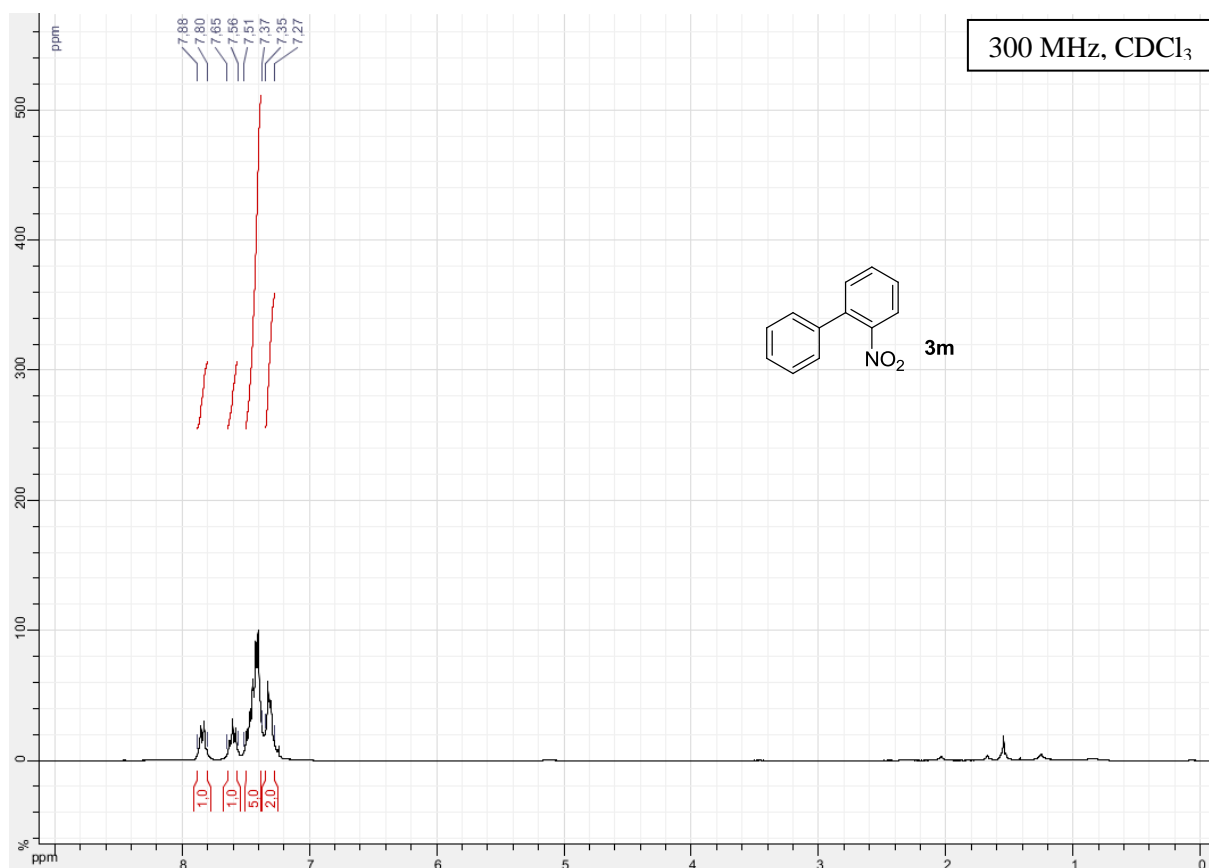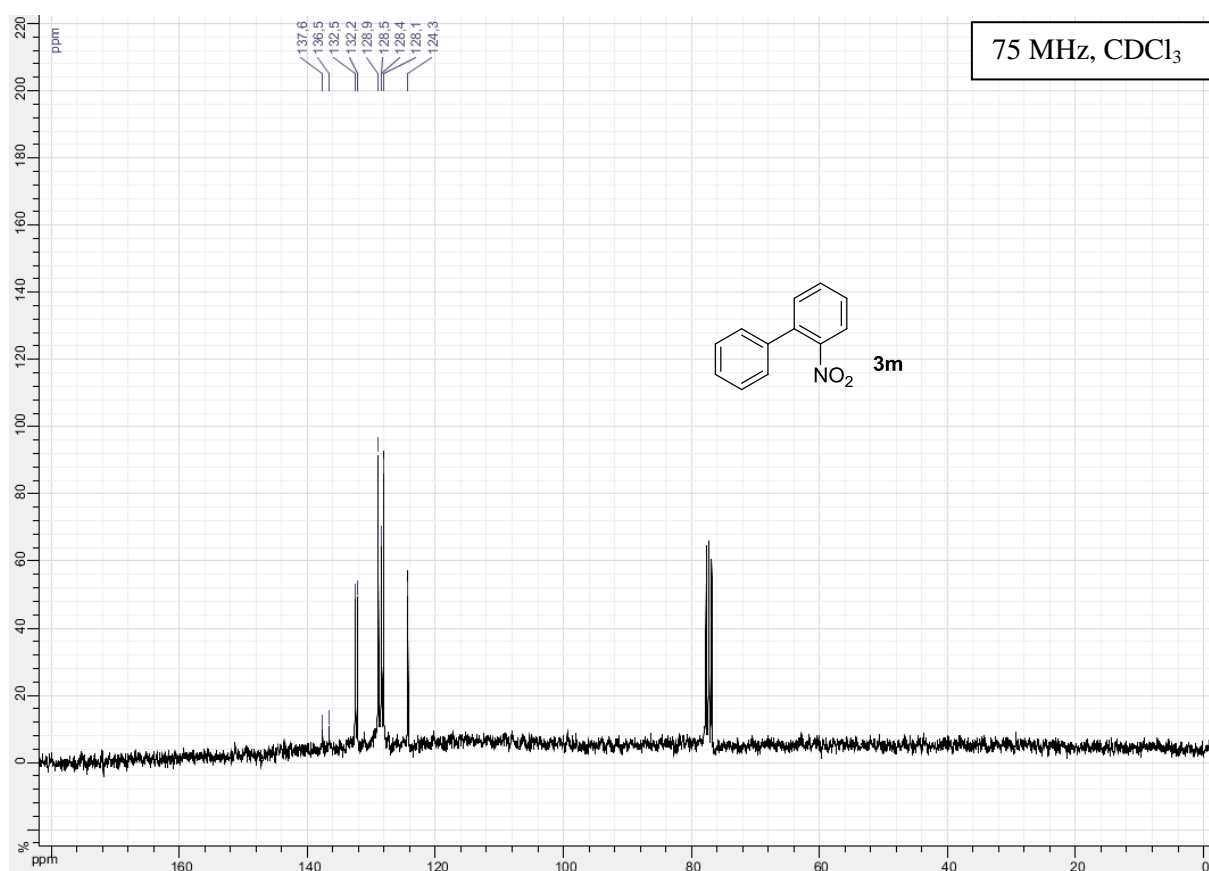

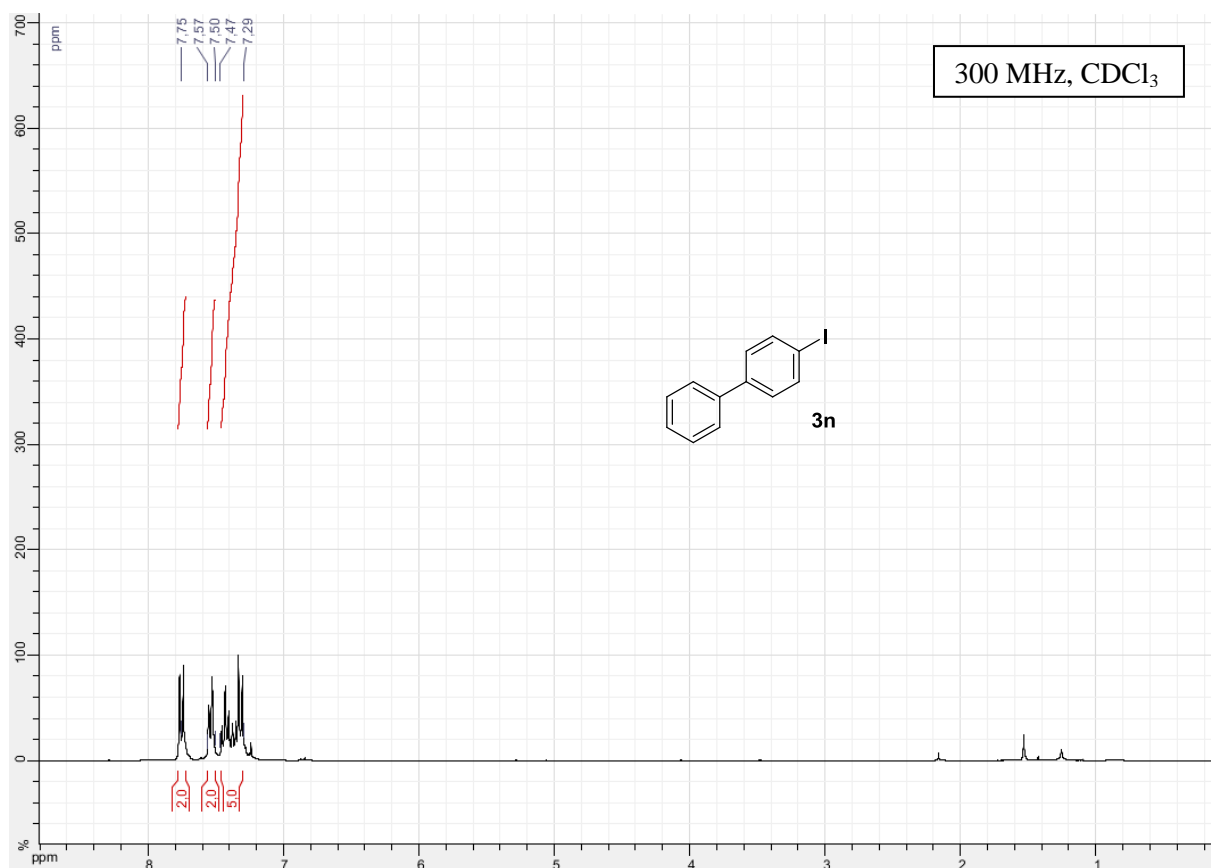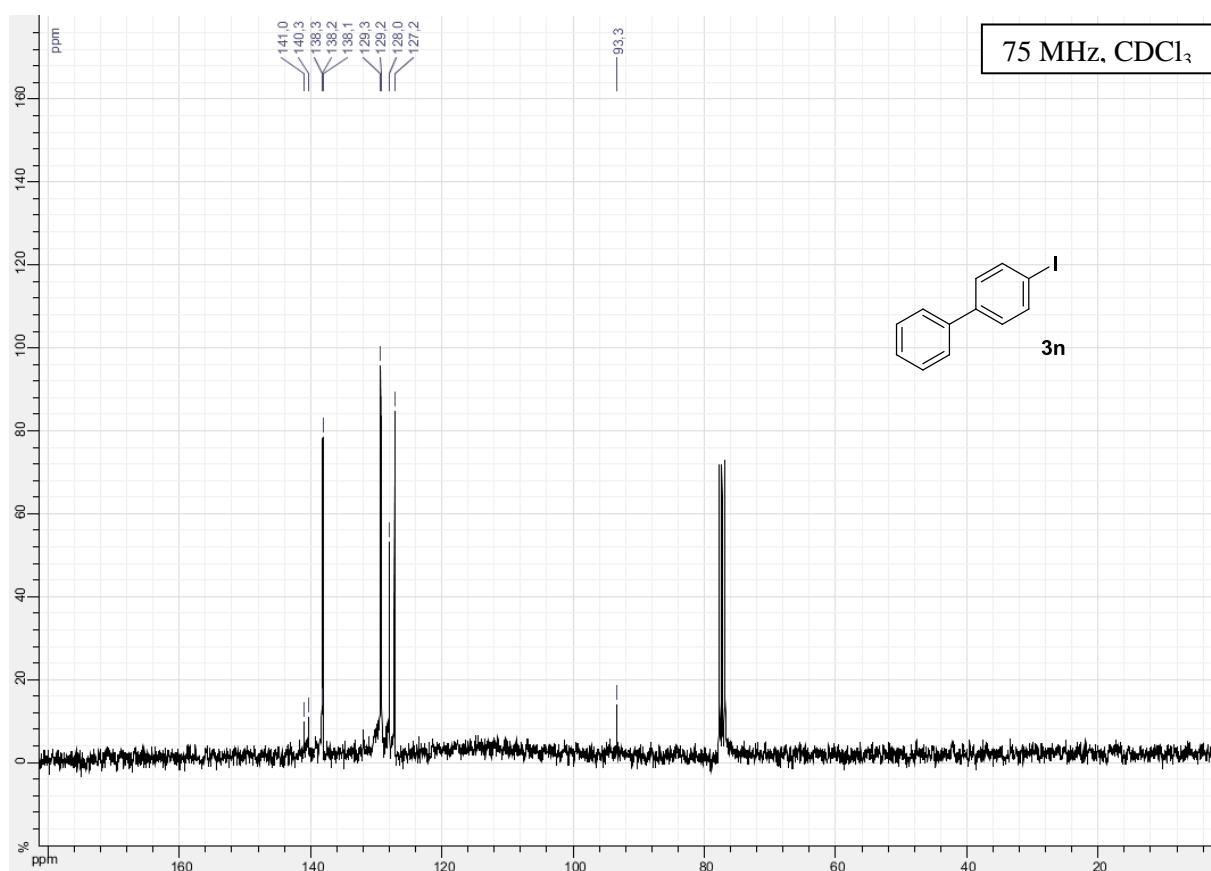

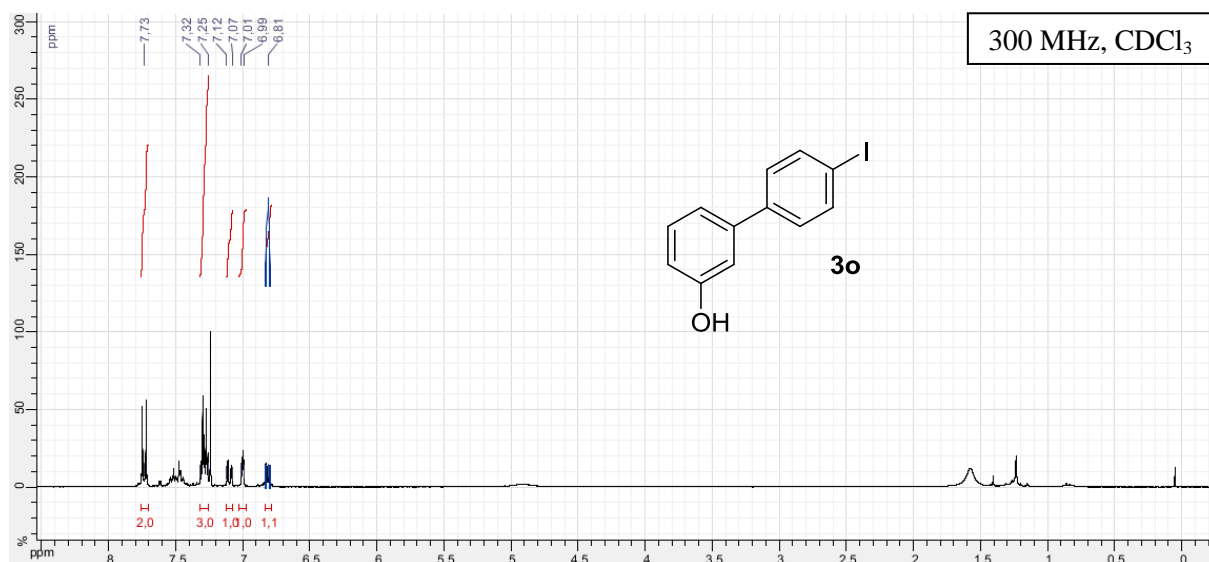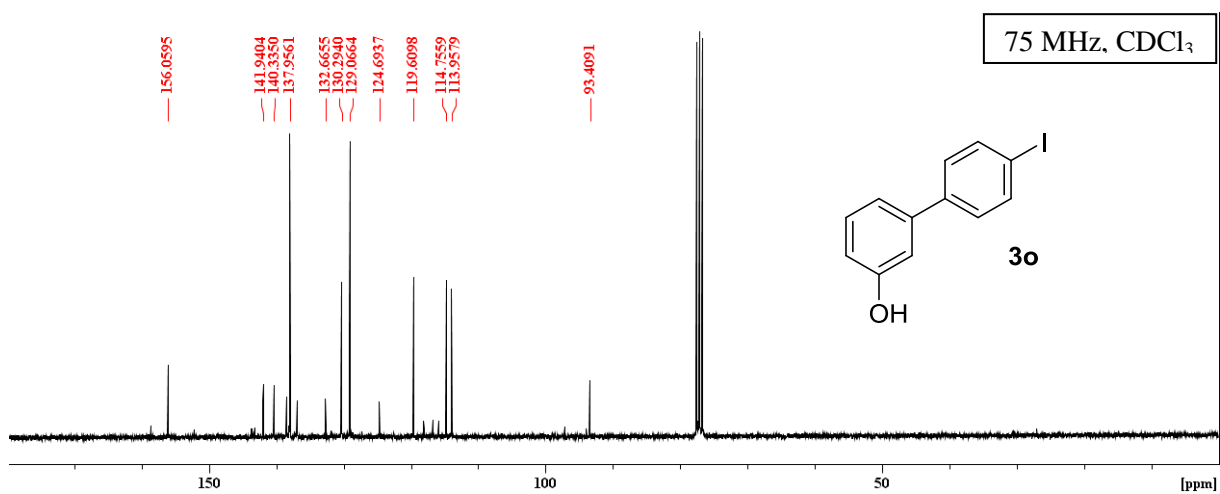

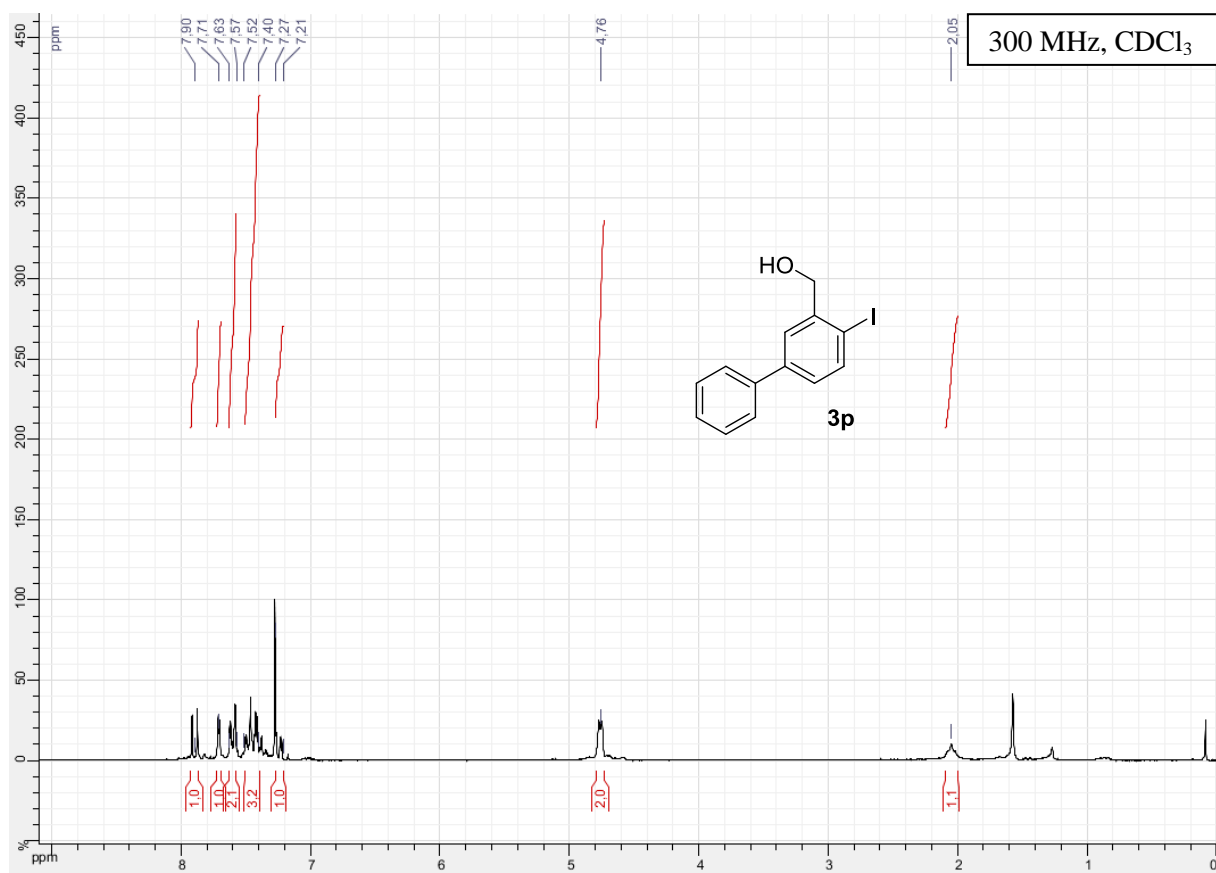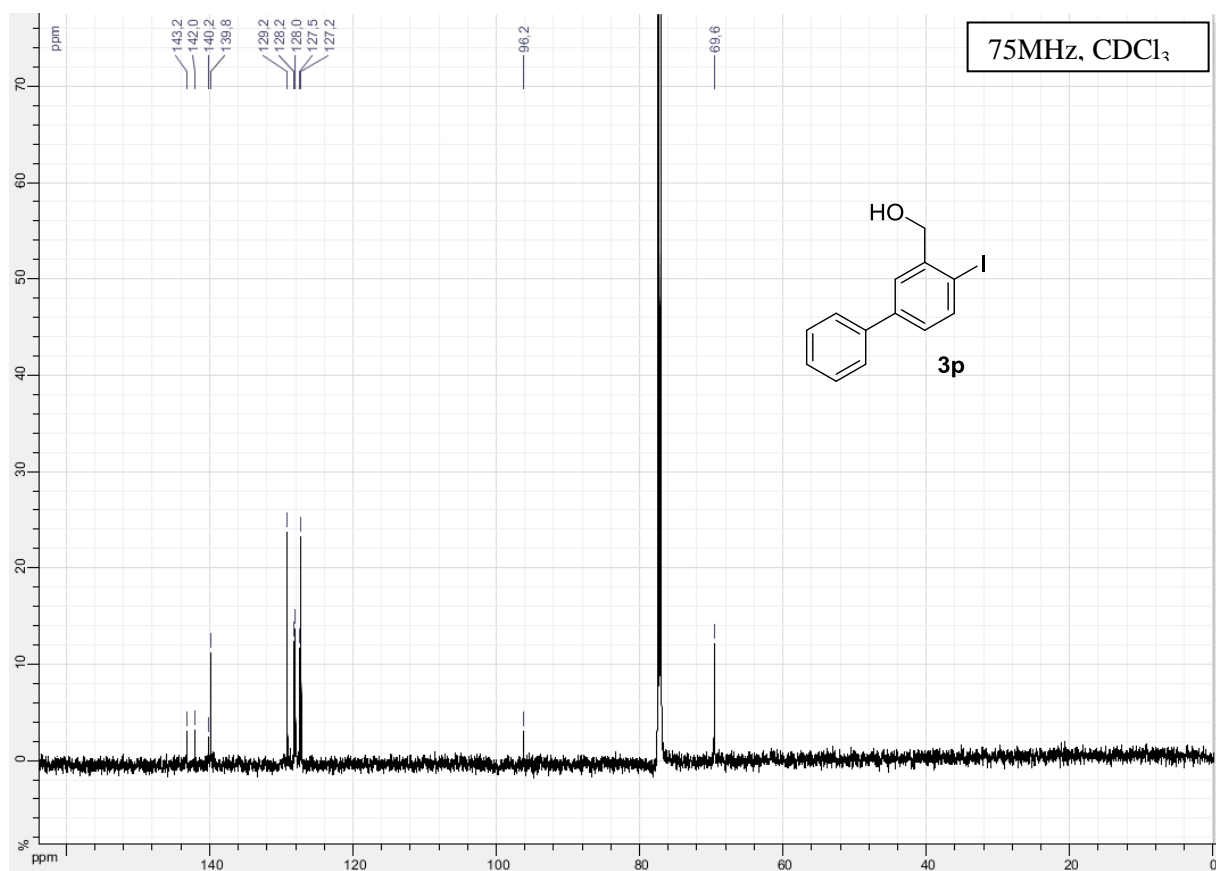

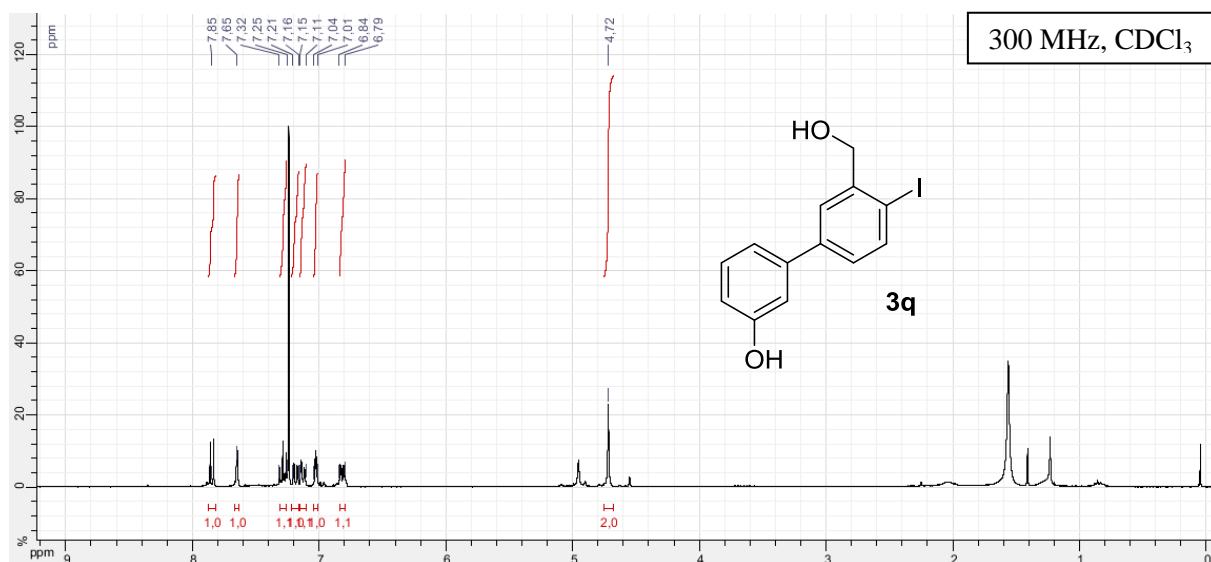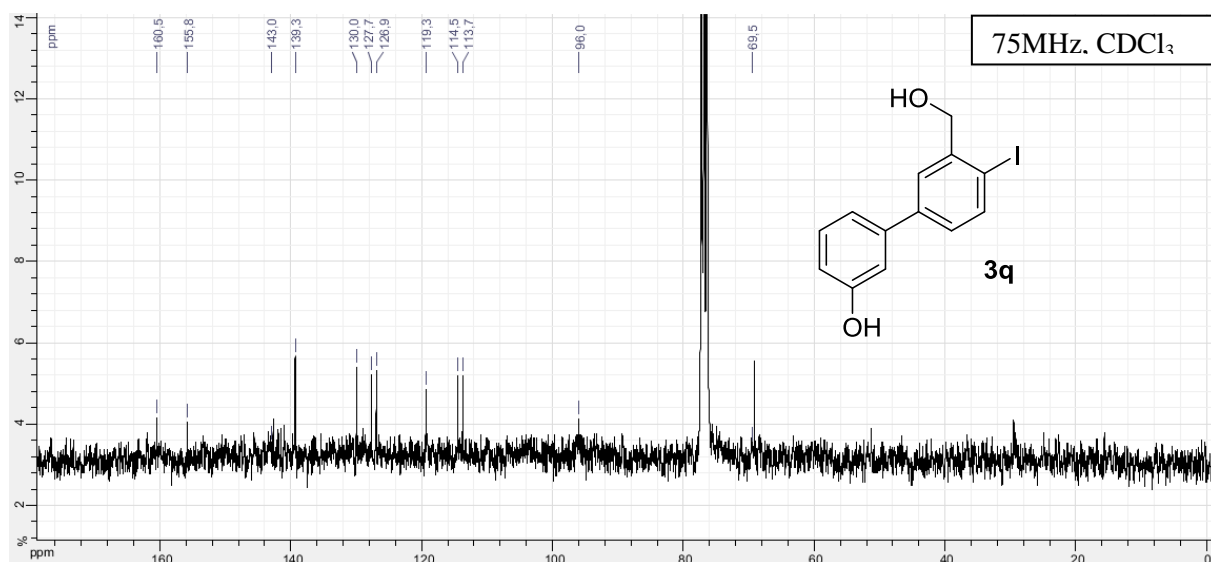

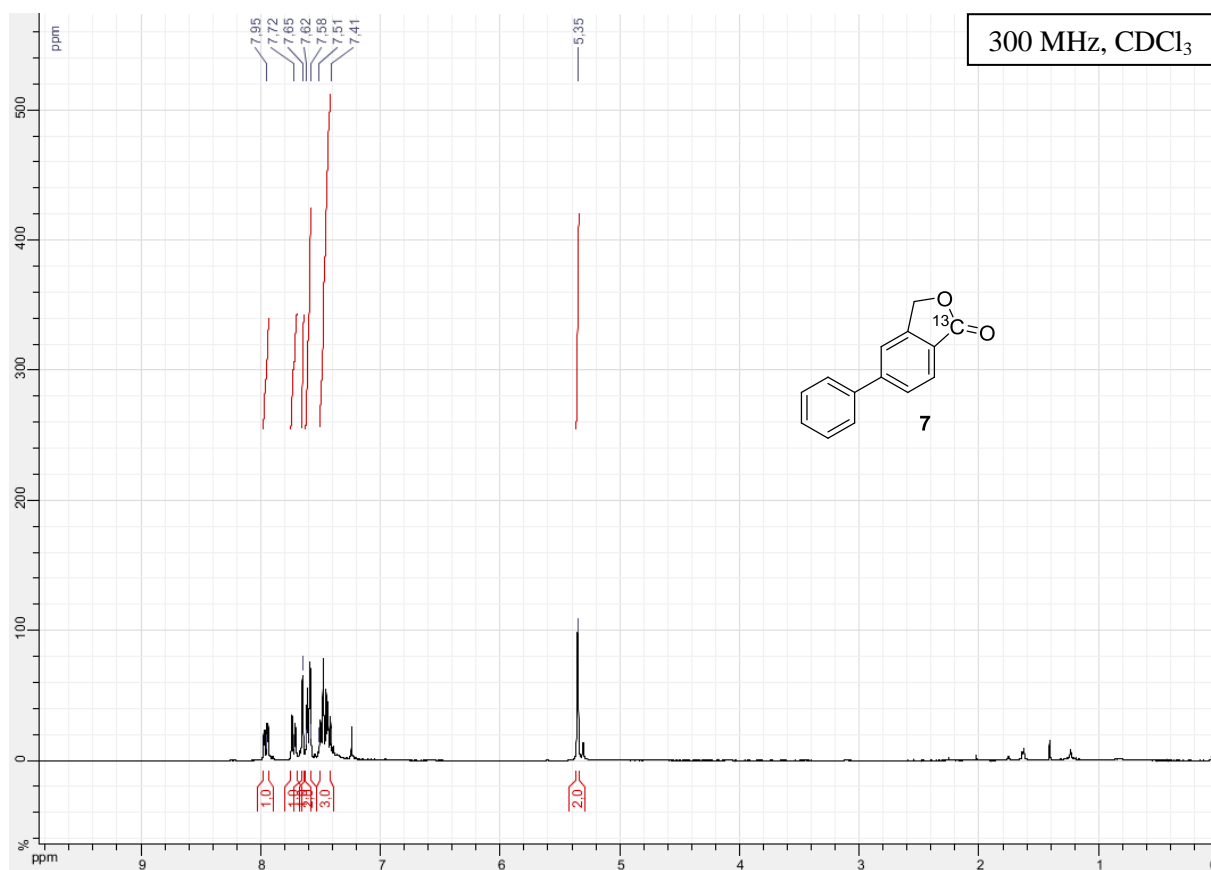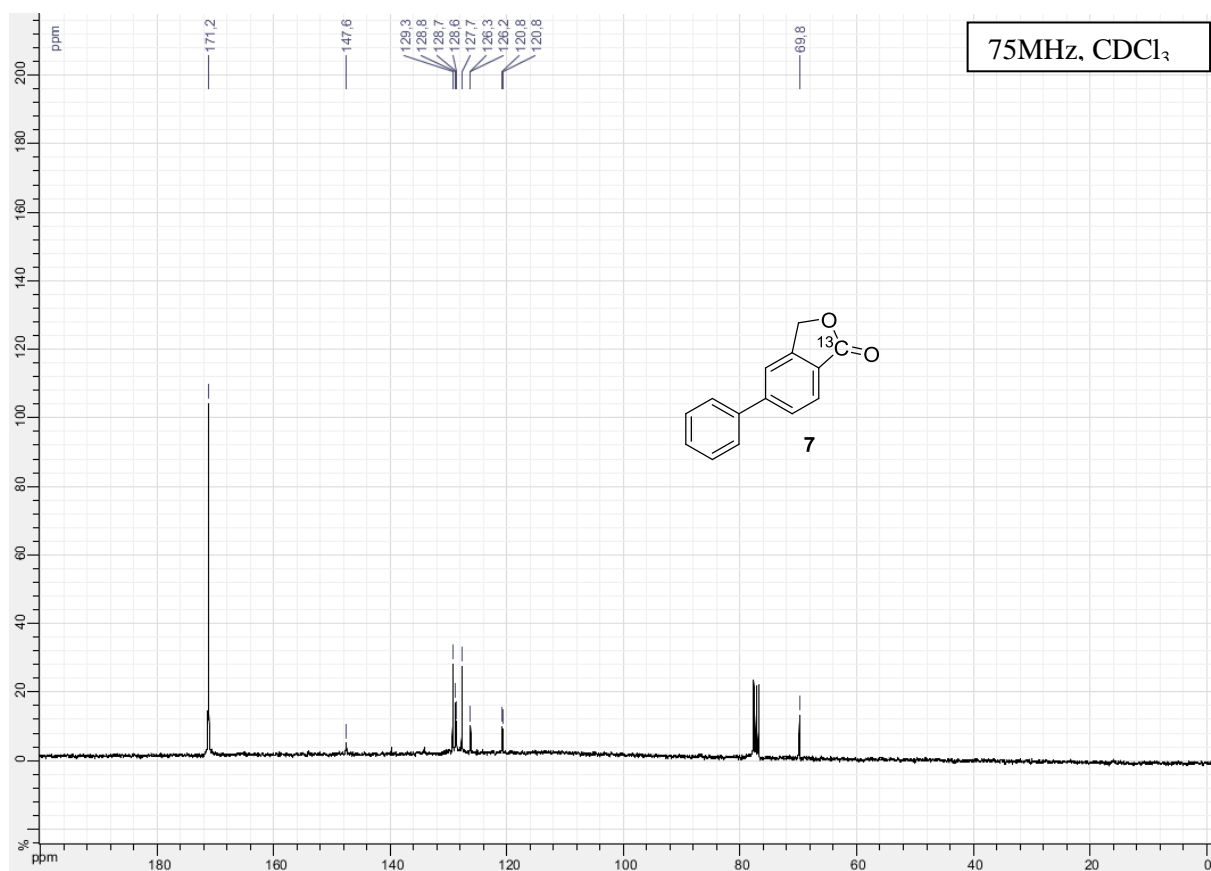



- 
- <sup>i</sup> H.Duan, S. Sengupta, J. L.Petersen, N.G.Akhmedov, X.Shi, *J. Am. Chem. Soc.* **2009**, 131, 12100.
- <sup>ii</sup> (a) Ł. Wozniak, J. J. Murphy, P. Melchiorre, *J. Am. Chem. Soc.* **2015**, 137, 5678. (b) M. N. Hopkinson, A. G  mez-Suarez, M. Teders, B. Sahoo, F. Glorius, *Angew. Chem. Int. Ed.* **2016**, 55, 4361.
- <sup>iii</sup> M. Monalti, et. al. Chemical Actinometry. *Handbook of Photochemistry*, 3<sup>rd</sup> Ed; Taylor and Francis Group, LLC. Boca Raton, FL, **2006**, 601.
- <sup>iv</sup> Tanimoro, K.; Ueno, M.; Takeda, K.; Kirihata, M.; Tanimori, S. *J. Org. Chem.* **2012**, 77, 7844.
- <sup>v</sup> Keesara, S.; Parvathaneni, S.; Dussa, G.; Mandapati, M. R. *J. Organomet. Chem.* **2014**, 765, 31.
- <sup>vi</sup> Han, W.; Liu, C.; Jin, Z. *Adv. Synth. Catal.* **2008**, 350, 501.
- <sup>vii</sup> Kulbitski, K.; Nisnevich, G.; Gandelman, M. *Adv. Synth. Catal.* **2011**, 353, 1438.
- <sup>viii</sup> Cris  stomo, F. P.; Mart  n, T.; Carrillo, R. *Angew. Chem. Int. Ed.* **2014**, 53, 2181.
- <sup>ix</sup> Nicolas, E.; Ohleier, A.; D'Accriscio, F.; P  charman, A.-F.; Demange, M.; Ribagnac, P.; Ballester, J.; Gosmini, C.; M  zailles, N. *Chem. Eur. J.* **2015**, 21, 7690.
- <sup>x</sup> Pe  afiel, I.; Pastor, I. M.; Yus, M.; Esteruelas, M. A.; Oliv  n, M.; O  ate, E. *Eur. J. Org. Chem.* **2011**, 2011, 7174.
- <sup>xi</sup> Felpin, F.-X.; Fouquet, E. *Adv. Synth. Catal.* **2008**, 350, 863.
- <sup>xii</sup> Xia, Q.; Liu, X.; Zhang, Y.; Chen, C.; Chen, W. *Org. Lett.* **2013**, 15, 3326.
- <sup>xiii</sup> Tobisu, M.; Xu, T.; Shimasaki, T.; Chatani, N. *J. Am. Chem. Soc.* **2011**, 133, 19505.
- <sup>xiv</sup> Zhao, Y.-L.; Li, Y.; Li, S.-M.; Zhou, Y.-G.; Sun, F.-Y.; Gao, L.-X.; Han, F.-S. *Adv. Synth. Catal.* **2011**, 353, 1543.
- <sup>xv</sup> Wintner, E. A.; Conn, M. M.; Rebek, J. *J. Am. Chem. Soc.* **1994**, 116, 8877.
- <sup>xvi</sup> Xia, Q.; Liu, X.; Zhang, Y.; Chen, C.; Chen, W. *Org. Lett.* **2013**, 15, 3326.
- <sup>xvii</sup> Kulbitski, K.; Nisnevich, G.; Gandelman, M. *Adv. Synth. Catal.* **2011**, 353, 1438.
- <sup>xviii</sup> Luo, J.; Preciado, S.; Larrosa, I. *Chem. Commun.* **2015**, 51, 3127.
